# Supplementary material for: Regioselective formylation of rhenium-oxo and gold corroles: substituent effects on optical spectra and redox potentials
Source: PubMed Central journal article supplement — RSC Adv. 2021 Oct 28;11(54):34086–94. doi: 10.1039/d1ra05525a (PMC9042328; doi:10.1039/d1ra05525a), 2021-10-28
Supplement: RA-011-D1RA05525A-s001.pdf [file RA-011-D1RA05525A-s001.pdf]

## Supplementary Information

# Regioselective Formylation of Rhenium-Oxo and Gold Corroles: Substituent Effects on Optical Spectra and Redox Potentials

Rune F. Einrem,<sup>a</sup> Einar Torfi Jonsson,<sup>a</sup> Simon J. Teat,<sup>b</sup> Nicholas S. Settineri,<sup>b,c</sup>  
Abraham B. Alemayehu,<sup>\*a</sup> and Abhik Ghosh<sup>\*.b</sup>

<sup>1</sup>Department of Chemistry, UiT – The Arctic University of Norway, N-9037 Tromsø,  
Norway; Email: abraham.alemayehu@uit.no (ABA), abhik.ghosh@uit.no (AG)

<sup>2</sup>Advanced Light Source, Lawrence Berkeley National Laboratory,  
Berkeley, CA 94720-8229, USA

<sup>3</sup>Department of Chemistry, University of California, Berkeley, Berkeley, California 94720,  
USA

| Contents                                      | Page |
|-----------------------------------------------|------|
| A. UV-vis spectra                             | S2   |
| B. Mass spectra                               | S10  |
| C. <sup>1</sup> H NMR spectra                 | S20  |
| D. Partial characterization of minor products | S36  |

### A. UV-vis spectra

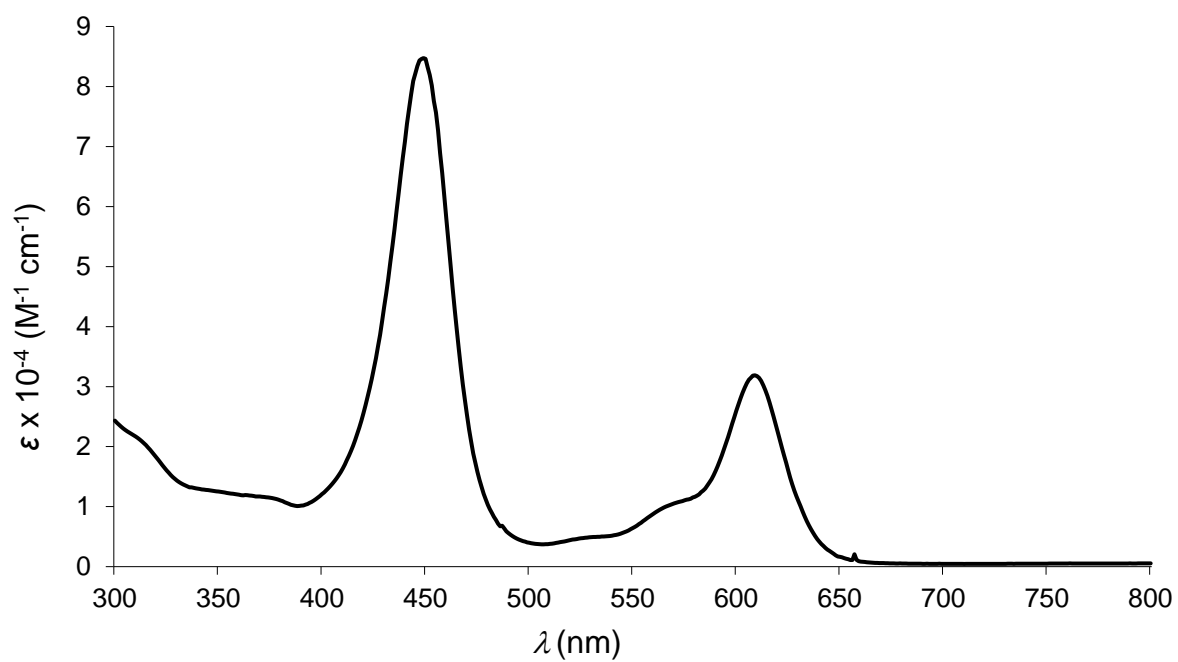

**Figure S1.** UV-vis spectrum of Re[TPC-3-CHO](O) in dichloromethane.

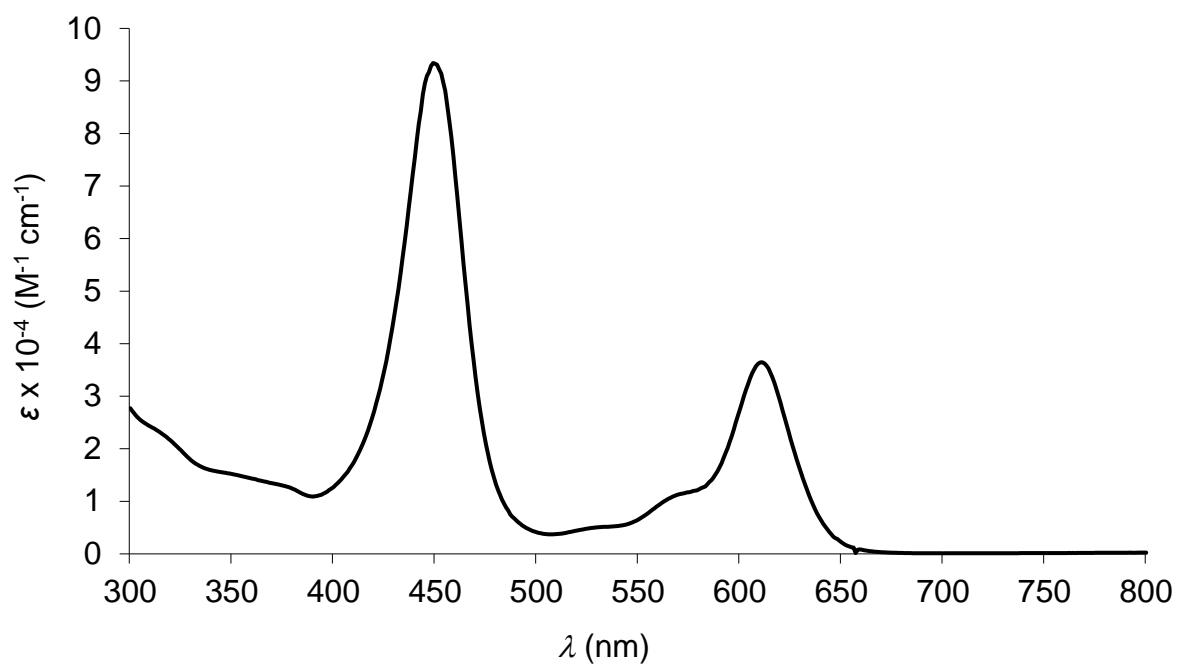

**Figure S2.** UV-vis spectrum of Re[TpCH<sub>3</sub>PC-3-CHO](O) in dichloromethane.

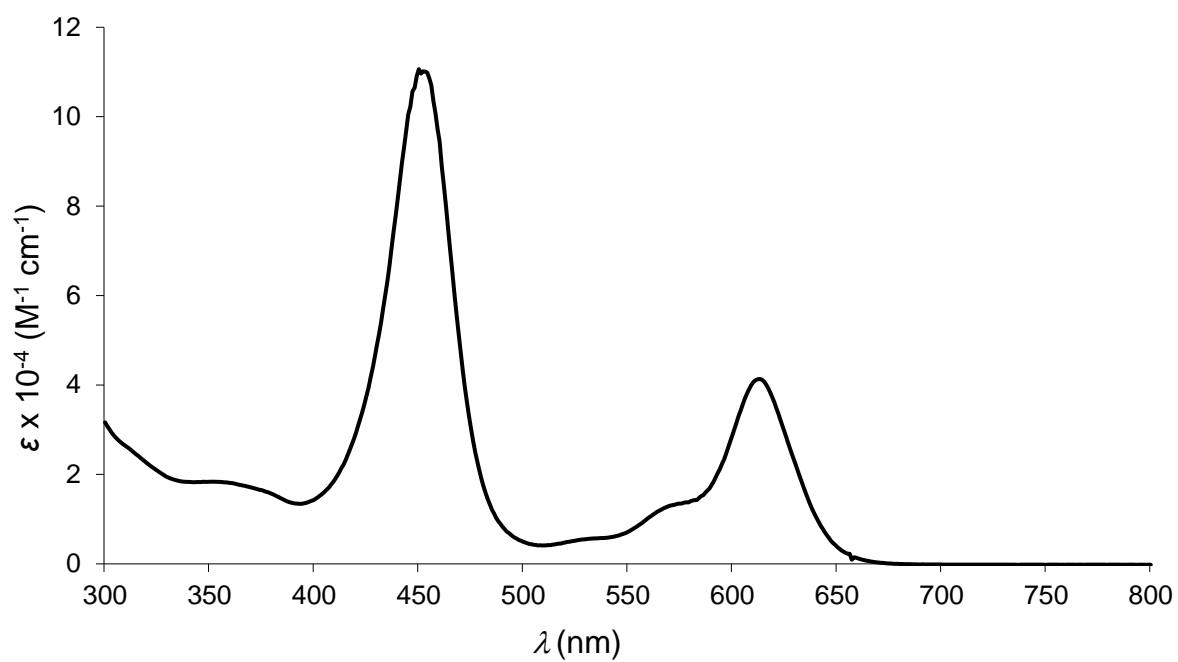

**Figure S3.** UV-vis spectrum of  $\text{Re}[\text{TpOCH}_3\text{PC-3-CHO}](\text{O})$  in dichloromethane.

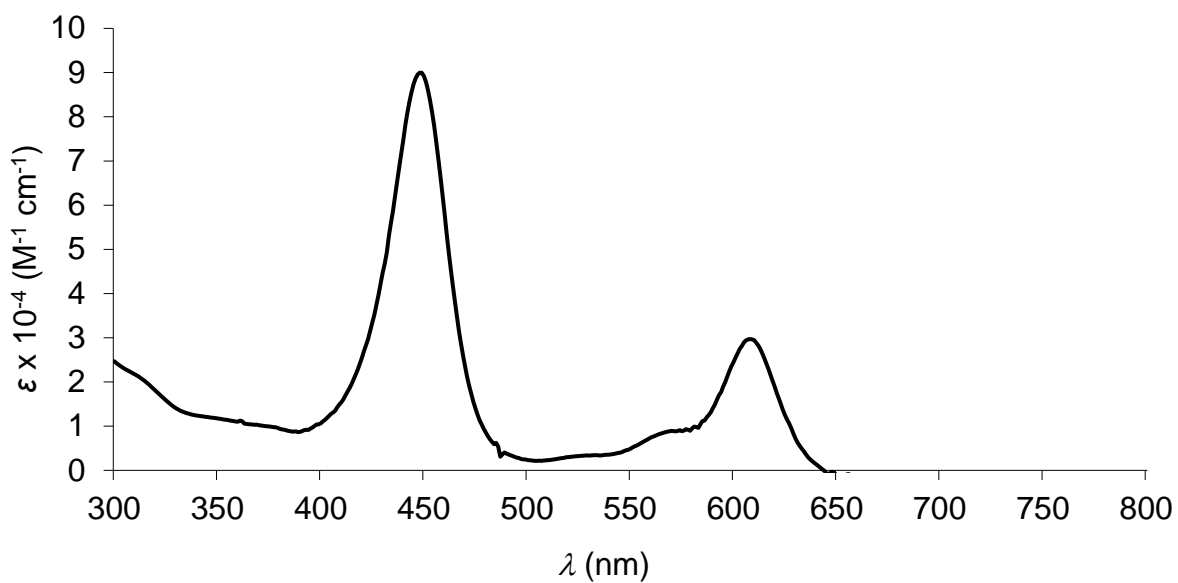

**Figure S4.** UV-vis spectrum of  $\text{Re}[\text{TpFPC-3-CHO}](\text{O})$  in dichloromethane.

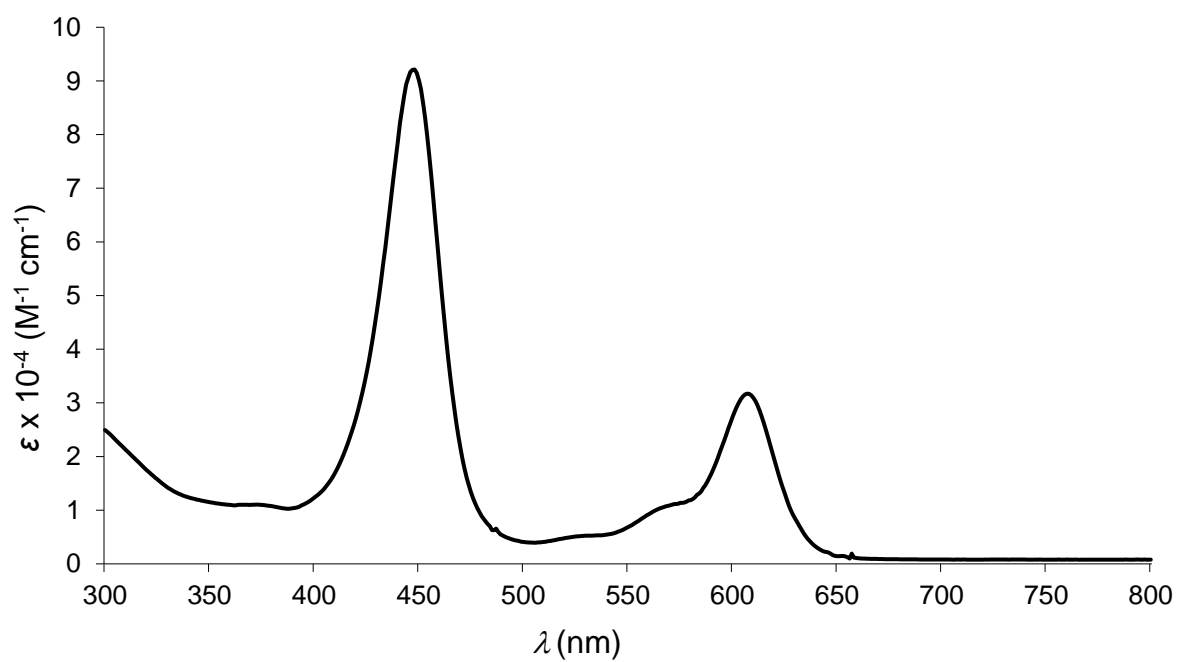

**Figure S5.** UV-vis spectrum of  $\text{Re}[\text{TpCF}_3\text{PC-3-CHO}](\text{O})$  in dichloromethane.

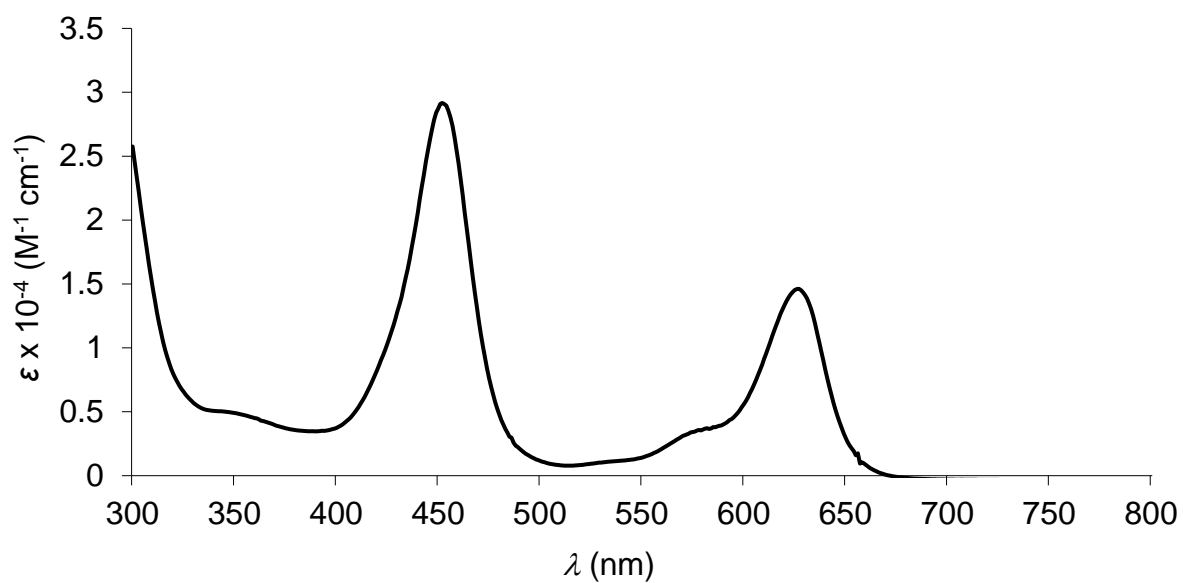

**Figure S6.** UV-vis spectrum of  $\text{Re}[\text{TpFPC-3,17-(CHO)}_2](\text{O})$  in dichloromethane.

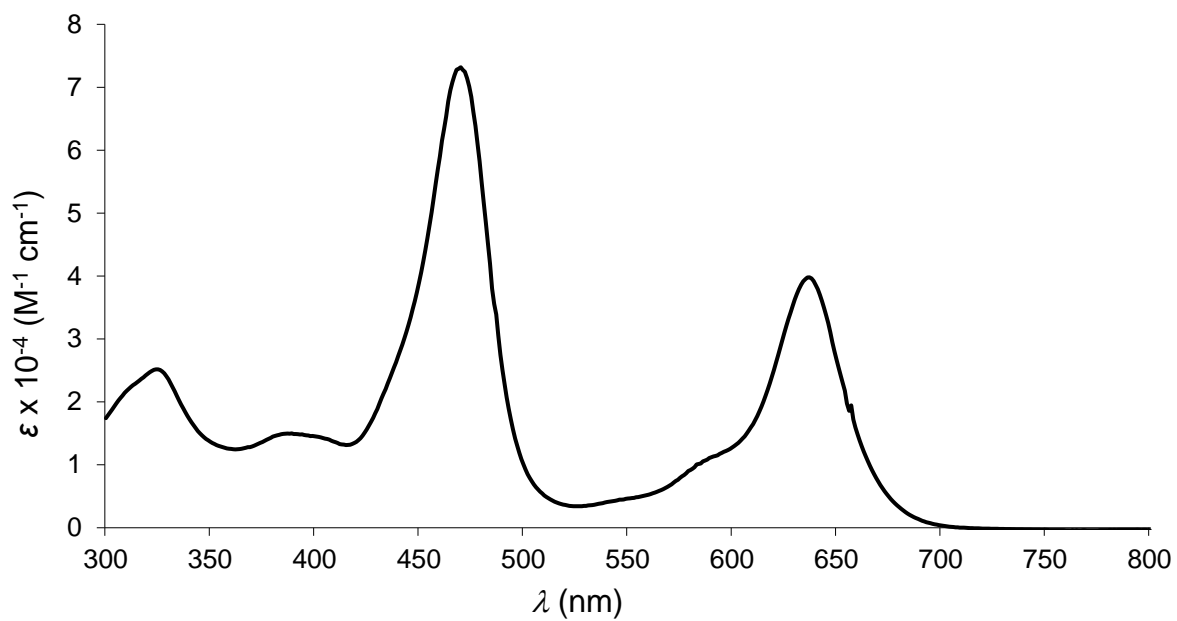

**Figure S7.** UV-vis spectrum of  $\text{Re}[\text{TPC-3-CH}(\text{CN})\text{COOH}](\text{O})$  in dichloromethane.

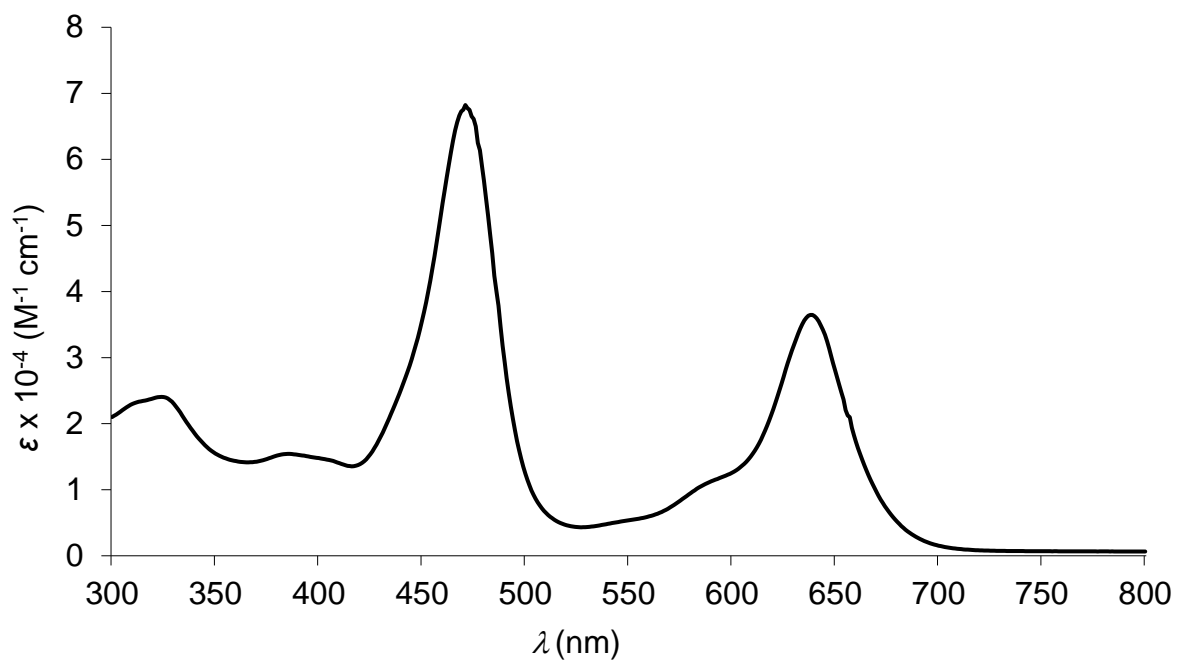

**Figure S8.** UV-vis spectrum of  $\text{Re}[\text{TpCH}_3\text{PC-3-CH}(\text{CN})\text{COOH}](\text{O})$  in dichloromethane.

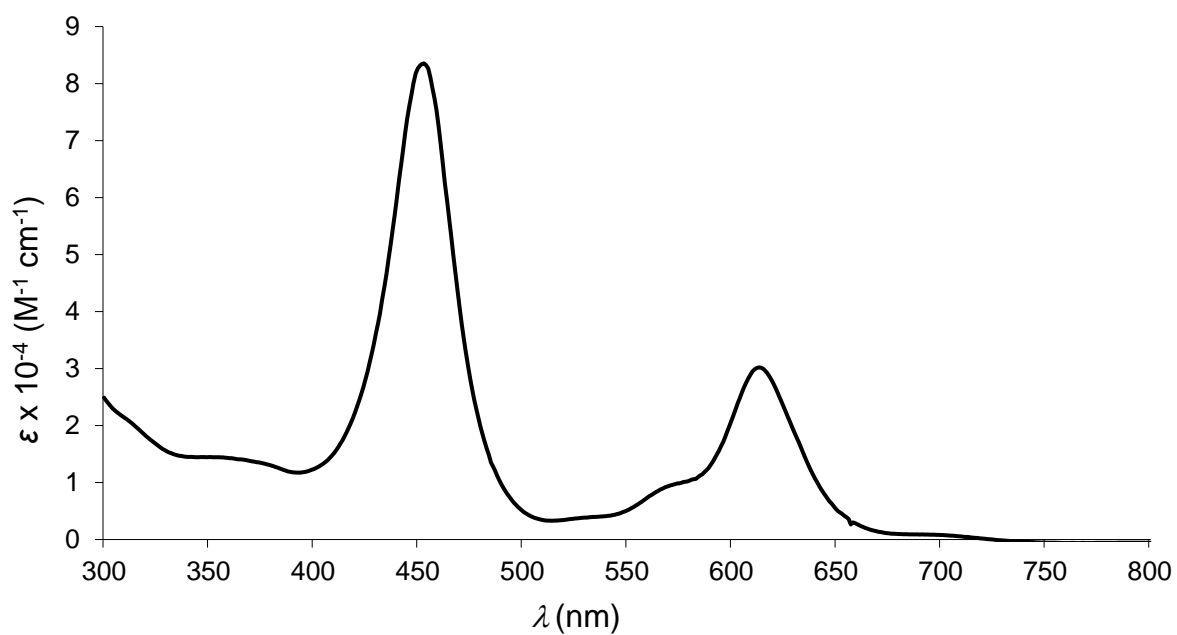

**Figure S9.** UV-vis spectrum of  $\text{Re}[\text{TpOCH}_3\text{PC-3-CH}(\text{CN})\text{COOH}](\text{O})$  in dichloromethane.

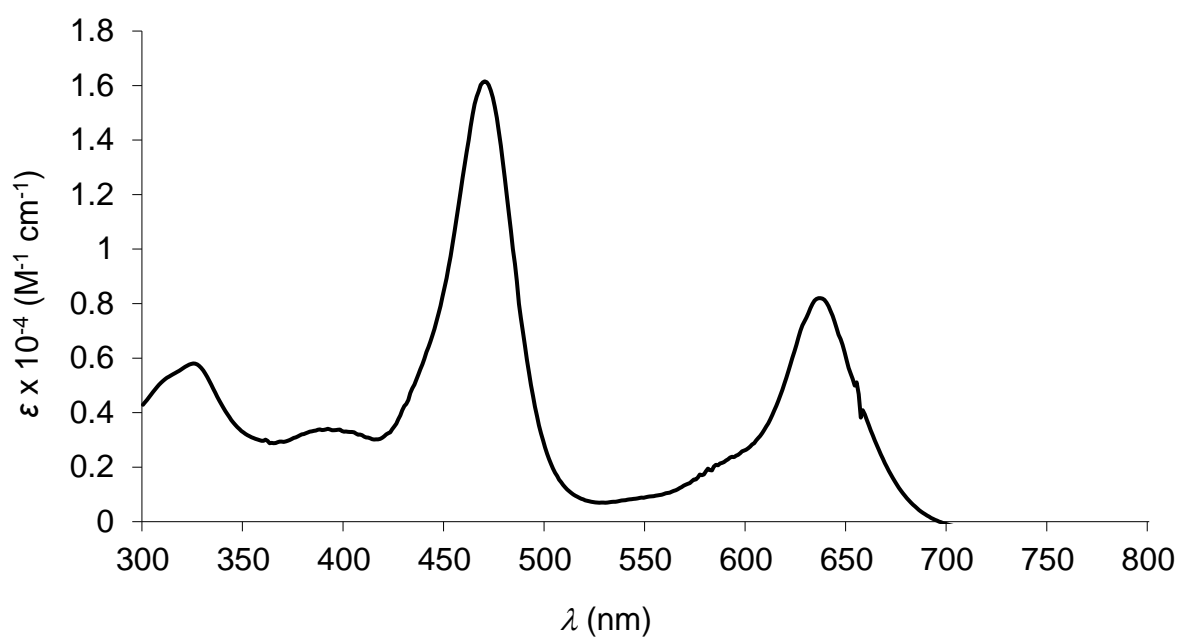

**Figure S10.** UV-vis spectrum of  $\text{Re}[\text{TpFPC-3-CH}(\text{CN})\text{COOH}](\text{O})$  in dichloromethane.

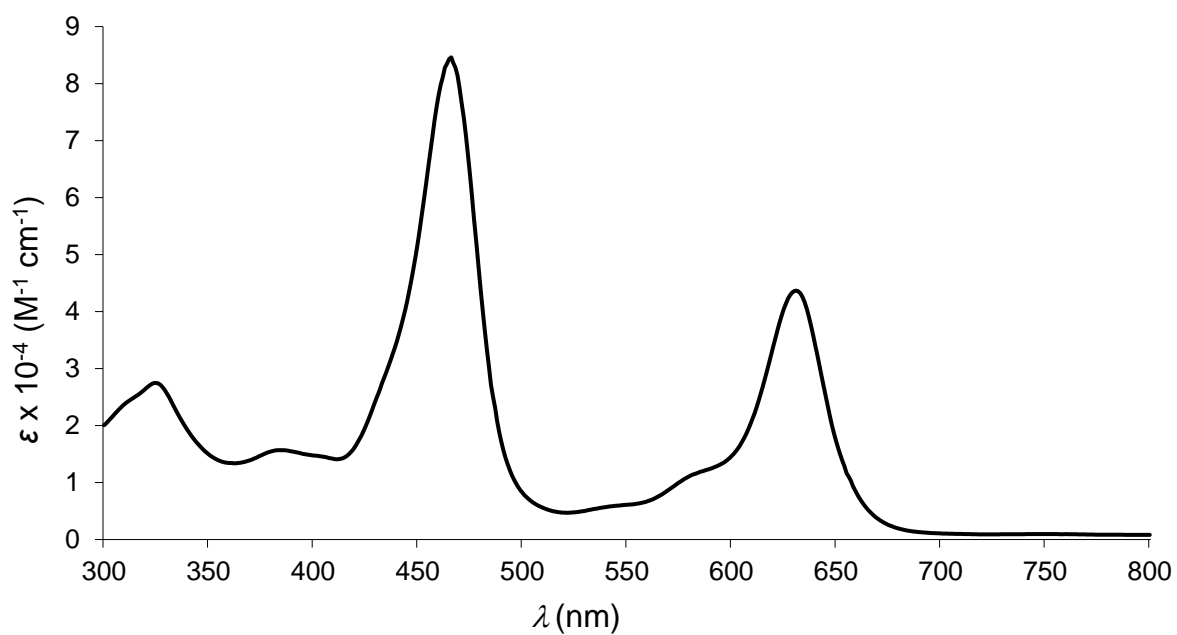

**Figure S11.** UV-vis spectrum of Re[TpCF<sub>3</sub>PC-3-CH(CN)COOH](O) in dichloromethane.

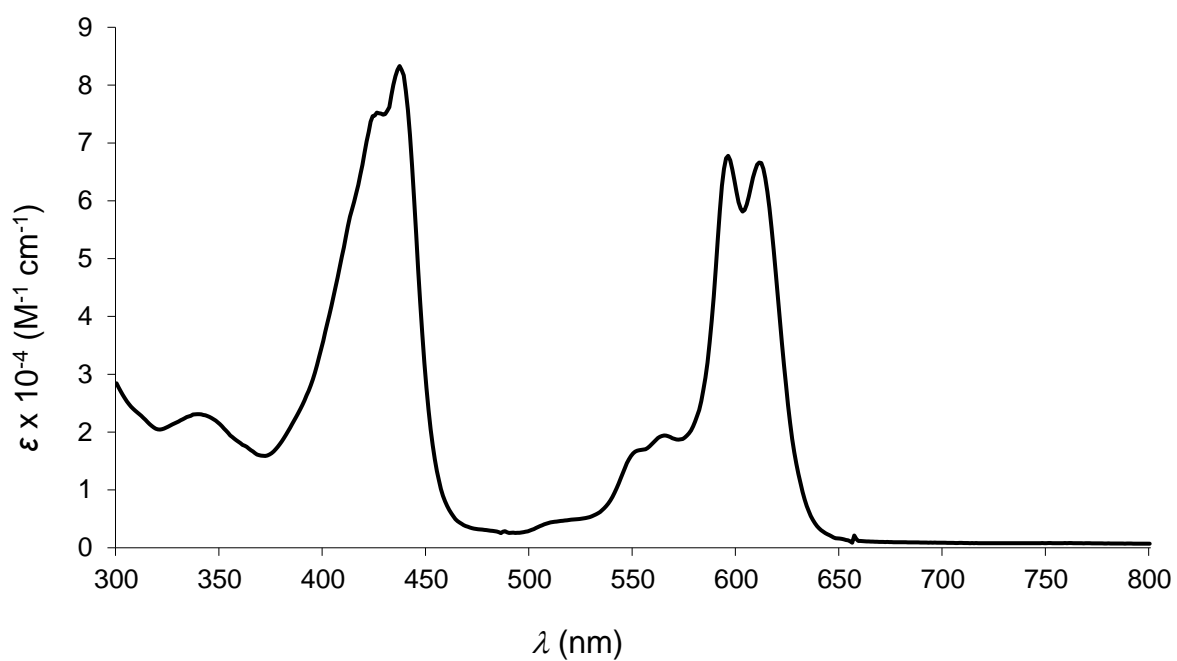

**Figure S12.** UV-vis spectrum of Au[TPC-3,17-(CHO)<sub>2</sub>] in dichloromethane.

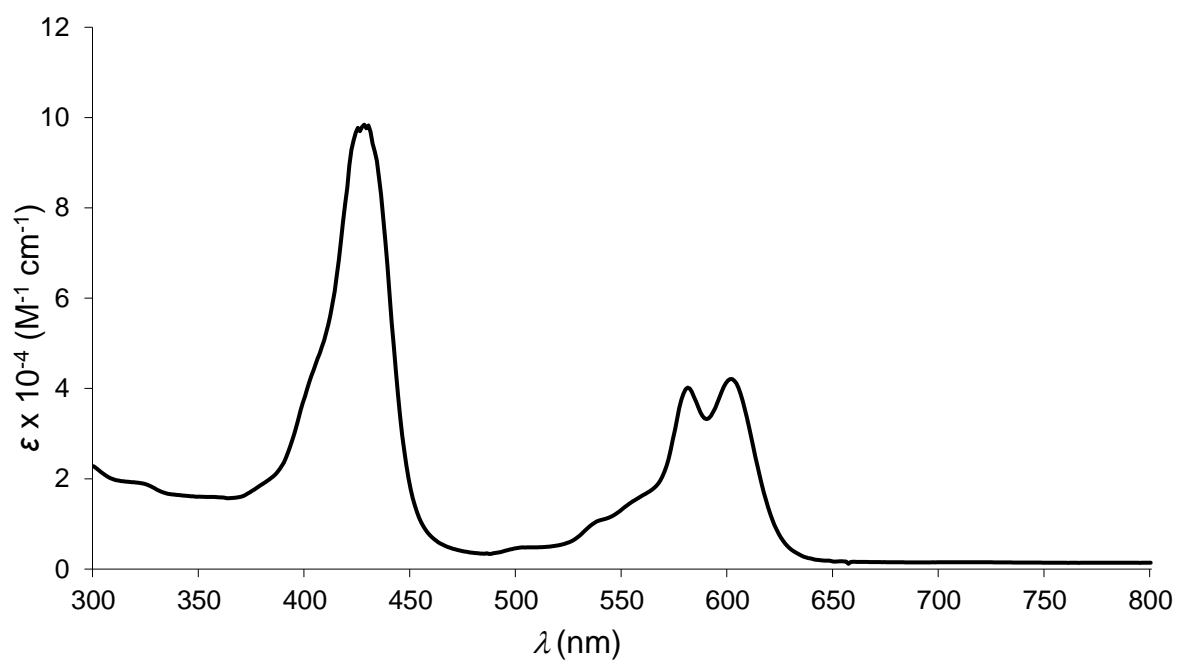

**Figure S13.** UV-vis spectrum of Au[TpCH<sub>3</sub>PC-3-CHO] in dichloromethane.

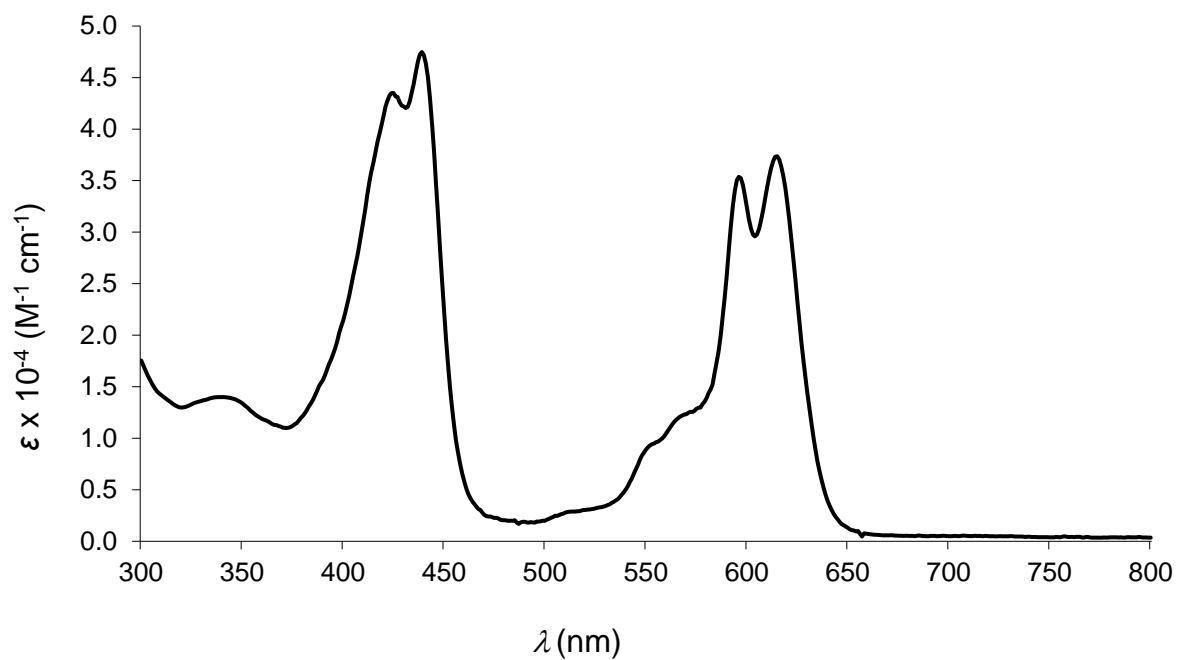

**Figure S14.** UV-vis spectrum of Au[TpCH<sub>3</sub>PC-3,17-(CHO)<sub>2</sub>] in dichloromethane.



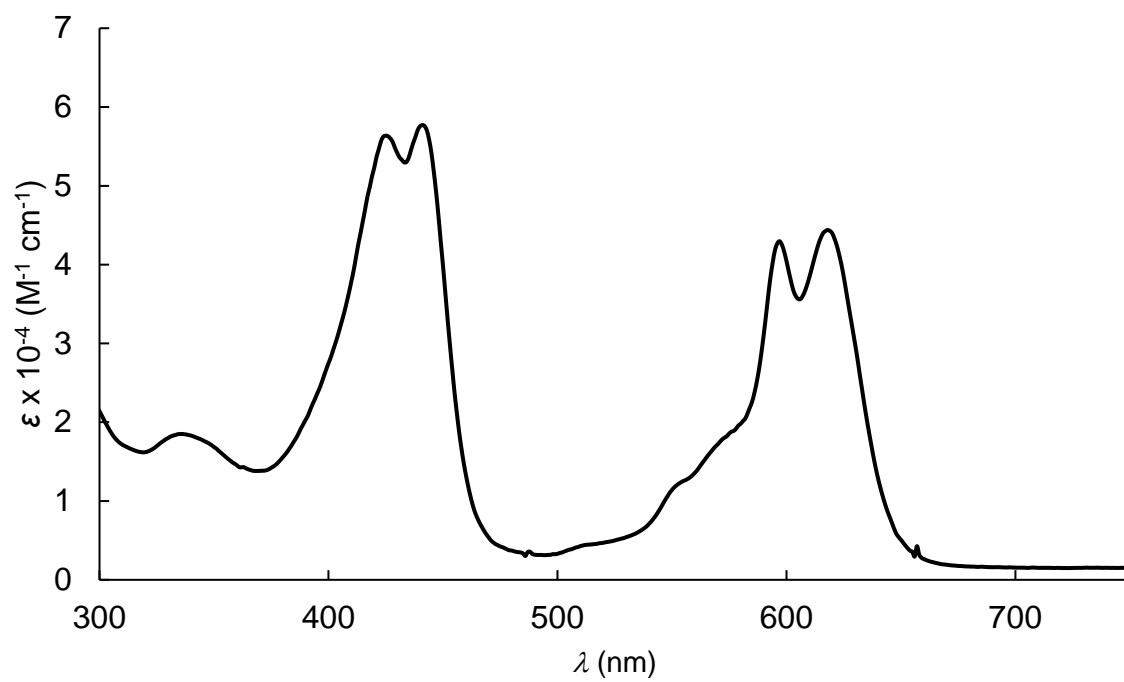

**Figure S15.** UV-vis spectrum of Au[TpOCH<sub>3</sub>PC-3,17-(CHO)<sub>2</sub>] in dichloromethane.

## B. HRMS-ESI mass spectra

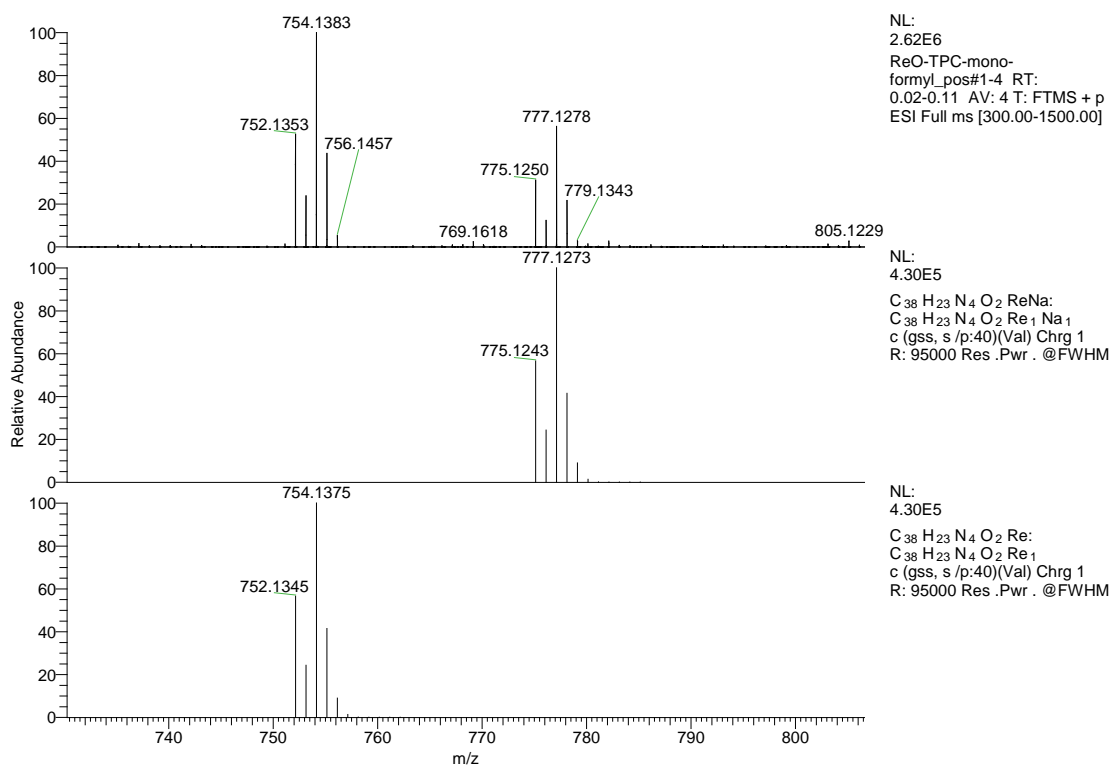

**Figure S16.** HRMS-ESI mass spectrum of  $\text{Re}[\text{TPC-3-CHO}](\text{O})$ .

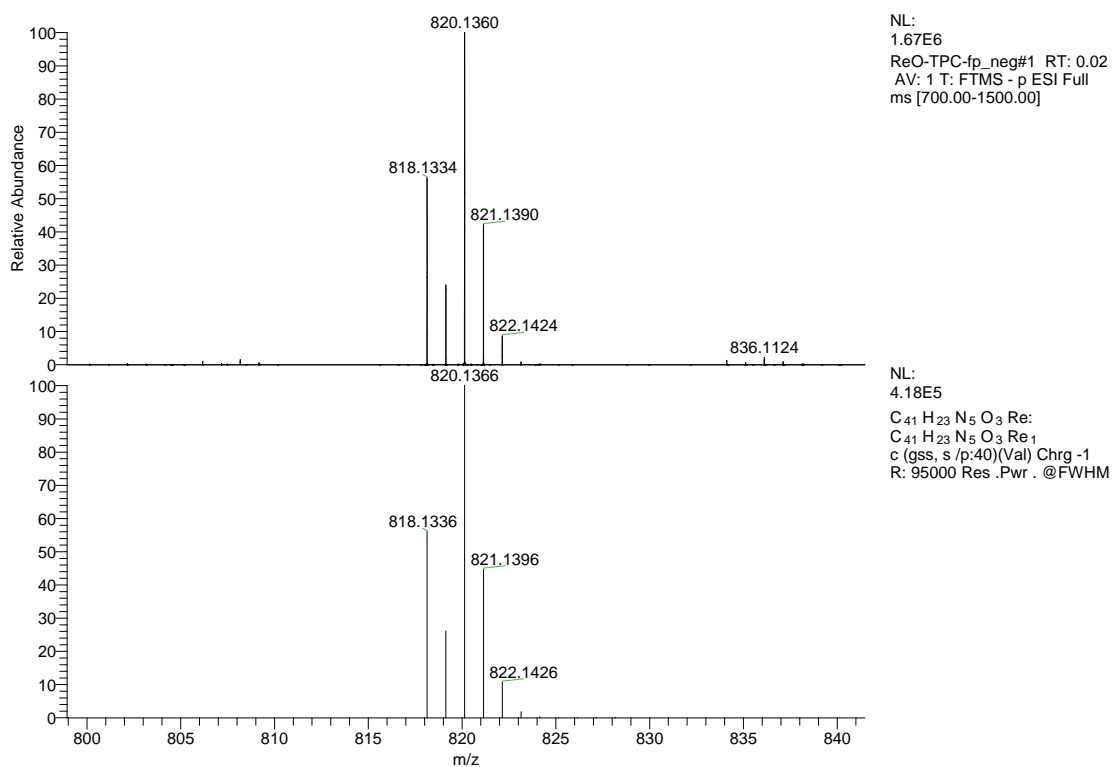

**Figure S17.** HRMS-ESI mass spectrum of  $\text{Re}[\text{TPC-3-CH}(\text{CN})\text{COOH}](\text{O})$ .

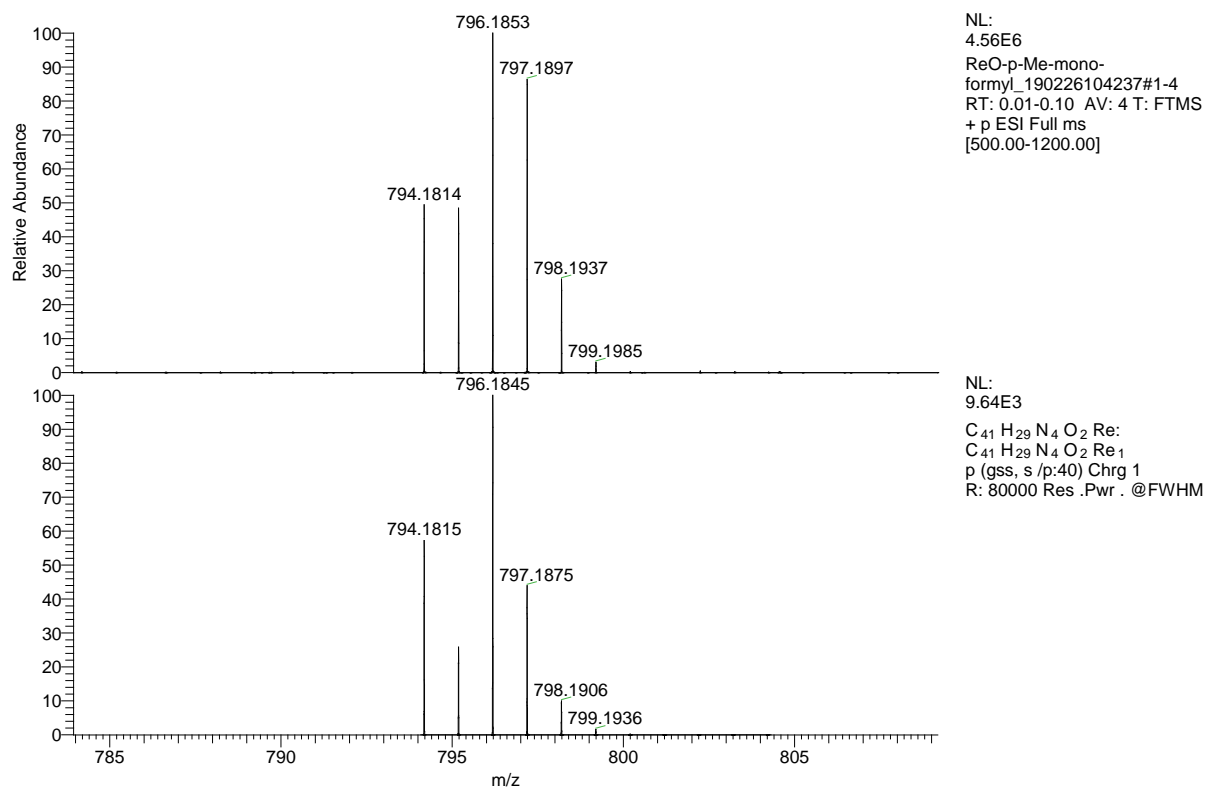

ReO-p-Me-mono-formyl\_190226104237 #1-4 RT: 0.01-0.10 AV: 4 NL: 4.56E6  
T: FTMS + p ESI Full ms [500.00-1200.00]

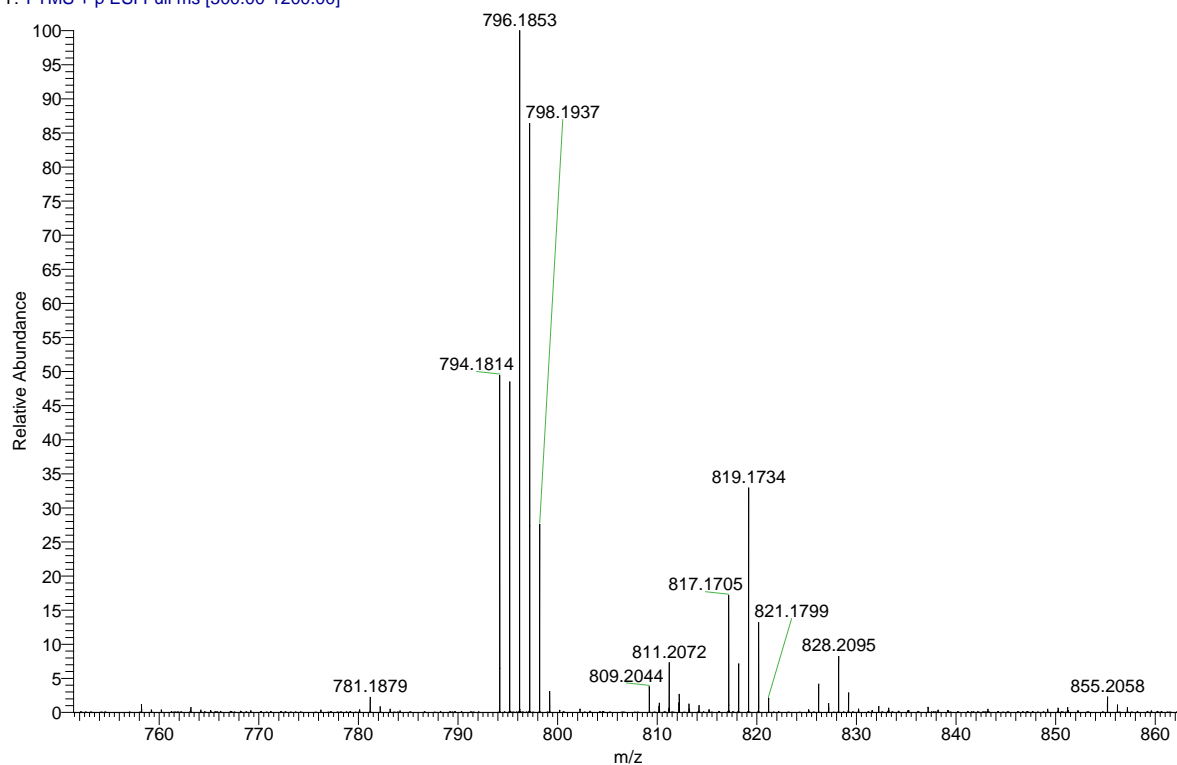

**Figure S18.** HRMS-ESI mass spectra of Re[*Tp*CH<sub>3</sub>PC-3-CHO](O).

ReOTpMePC(CHO)<sub>2</sub>\_pos #1-5 | RT: 0.01-0.12 | AV: 5 | NL: 3.06E6  
T: FTMS + p ESI Full ms [100.00-2000.00]

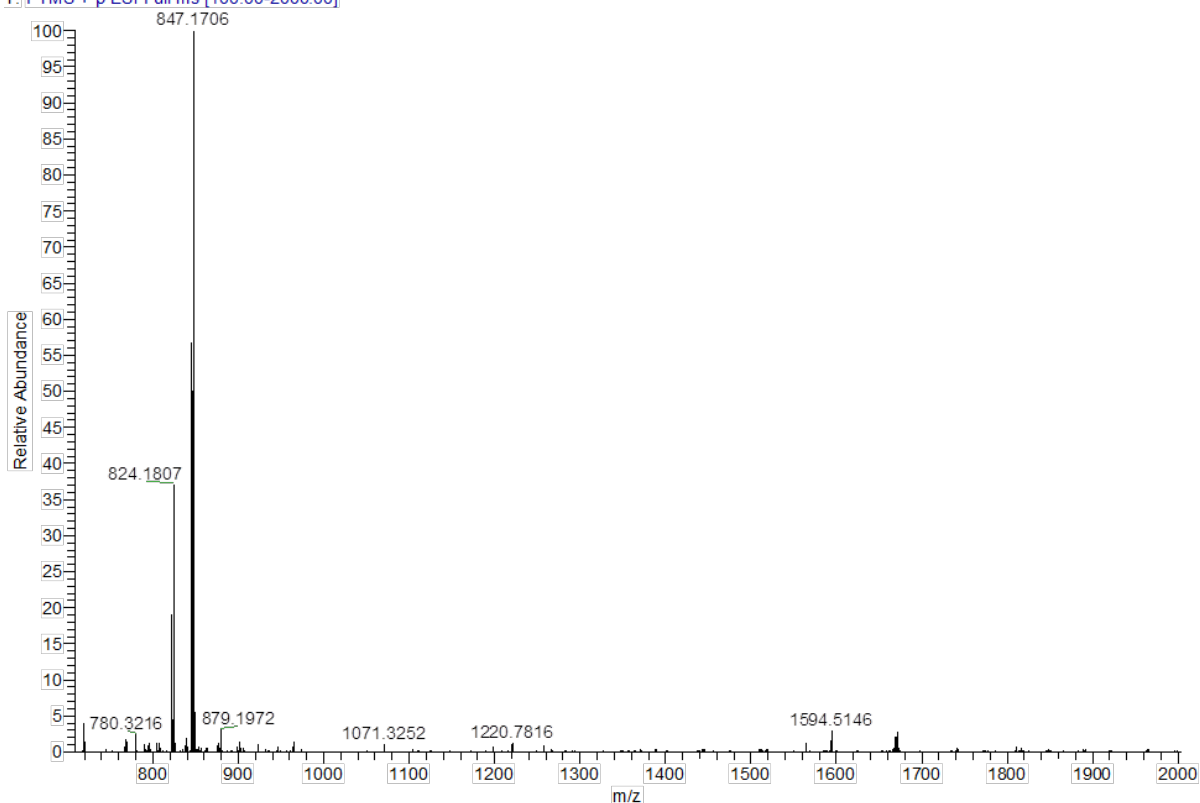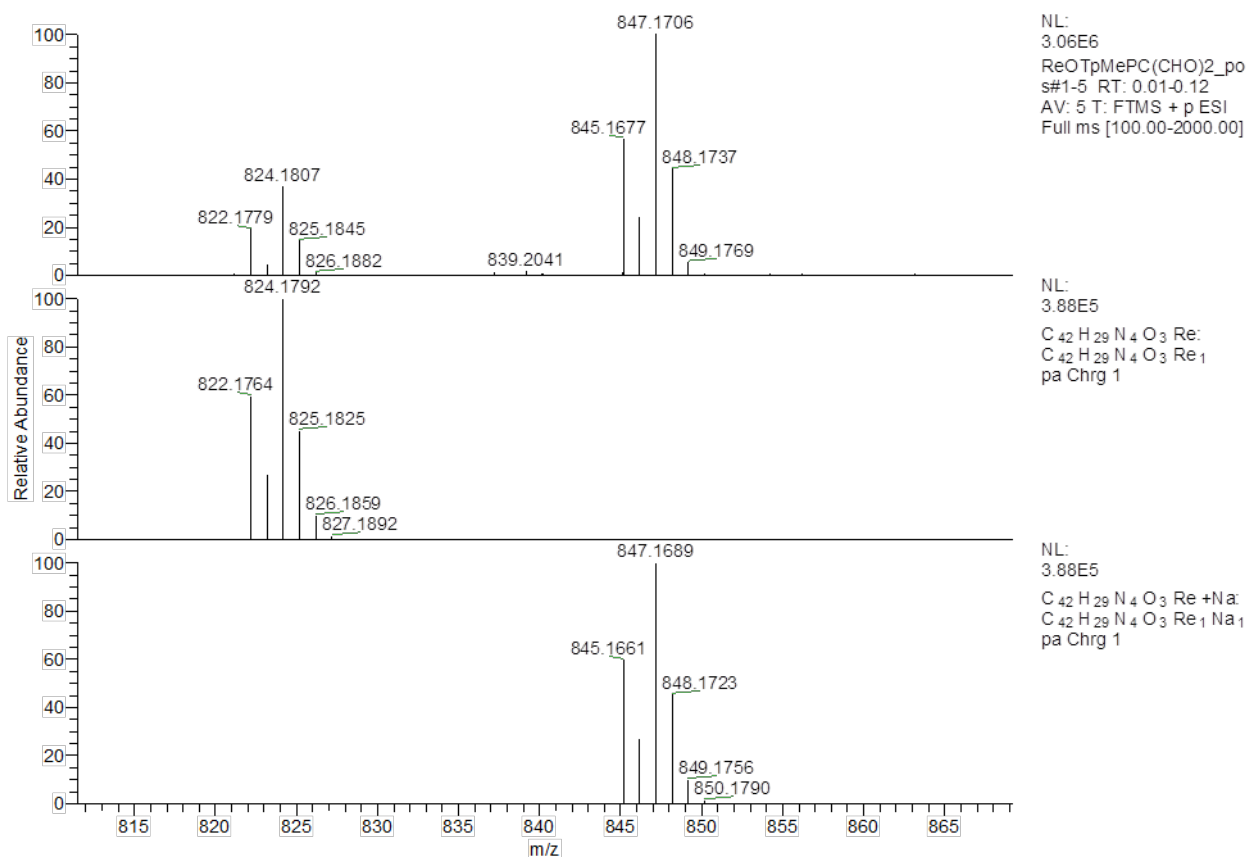

Figure S19. HRMS-ESI mass spectra of Re[*Tp*CH<sub>3</sub>PC-3,17-(CHO)<sub>2</sub>](O).

ReO-CN-COOH\_neg #1-3 RT: 0.02-0.09 AV: 3 NL: 4.68E5  
T: FTMS - p ESI Full ms [200.00-1500.00]

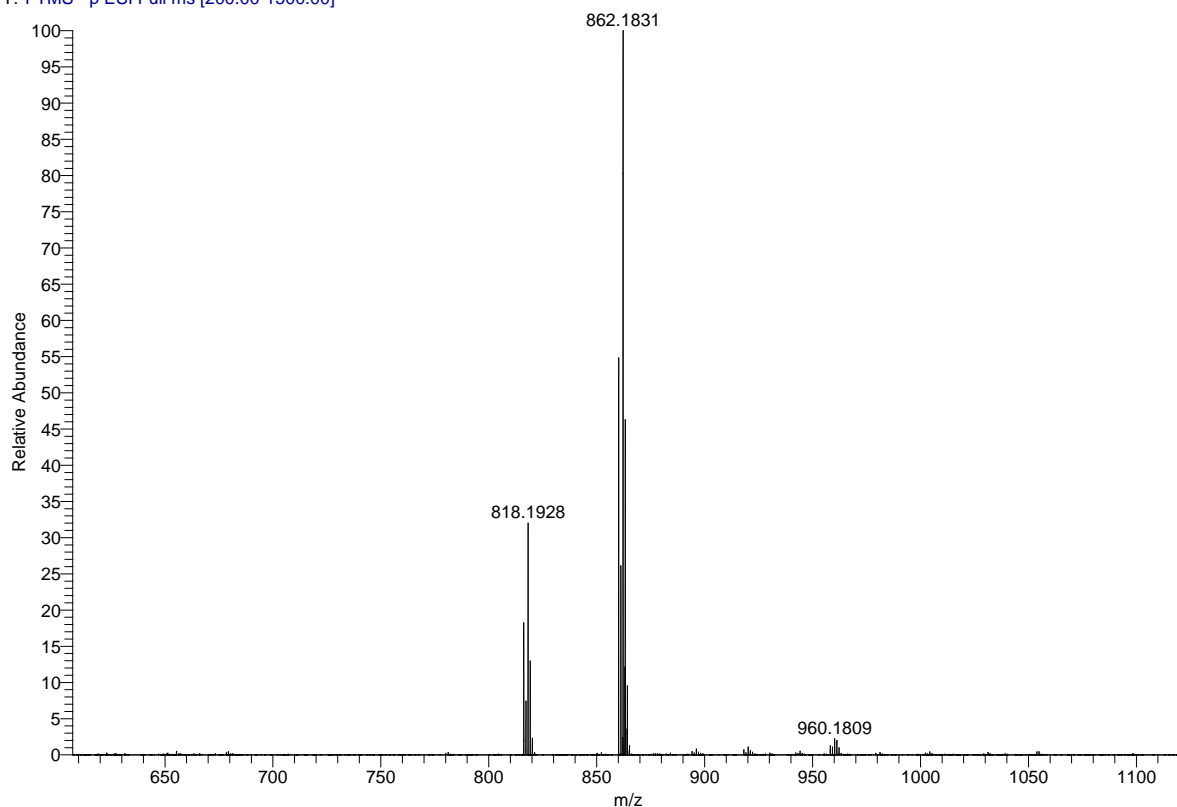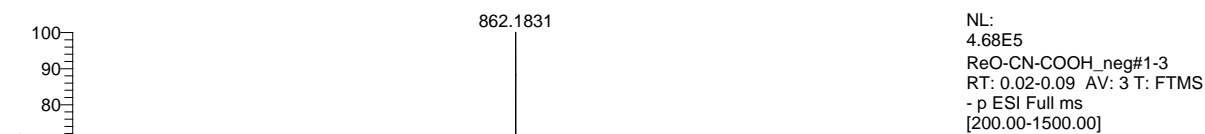

NL:  
4.68E5  
ReO-CN-COOH\_neg#1-3  
RT: 0.02-0.09 AV: 3 T: FTMS  
- p ESI Full ms  
[200.00-1500.00]

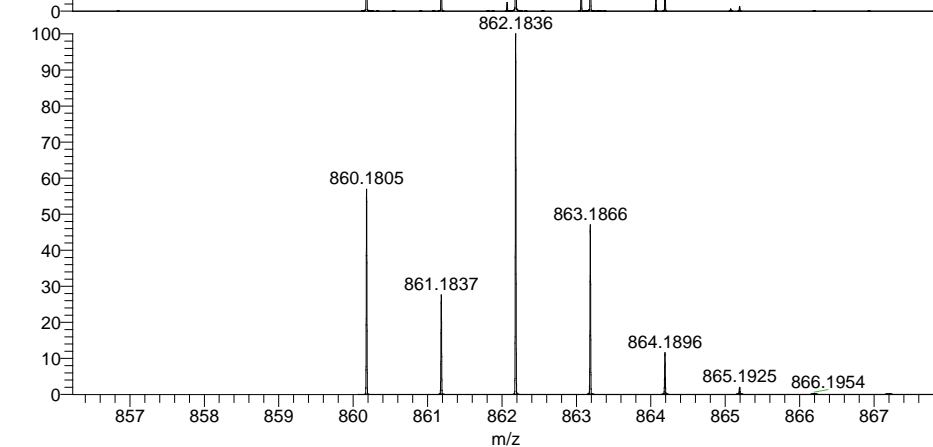

NL:  
9.33E3  
C<sub>44</sub> H<sub>29</sub> N<sub>5</sub> O<sub>3</sub> Re:  
C<sub>44</sub> H<sub>29</sub> N<sub>5</sub> O<sub>3</sub> Re<sub>1</sub>  
p (gss, s /p:40) Chrg -1  
R: 91000 Res .Pwr . @FWHM

Figure S20. HRMS-ESI mass spectra of Re[*Tp*CH<sub>3</sub>PC-3-CH(CN)COOH](O).

ReO-pOMe-CHO\_190717092110 #1-5 RT: 0.01-0.12 AV: 5 NL: 3.74E6  
T: FTMS + p ESI Full ms [500.00-1500.00]

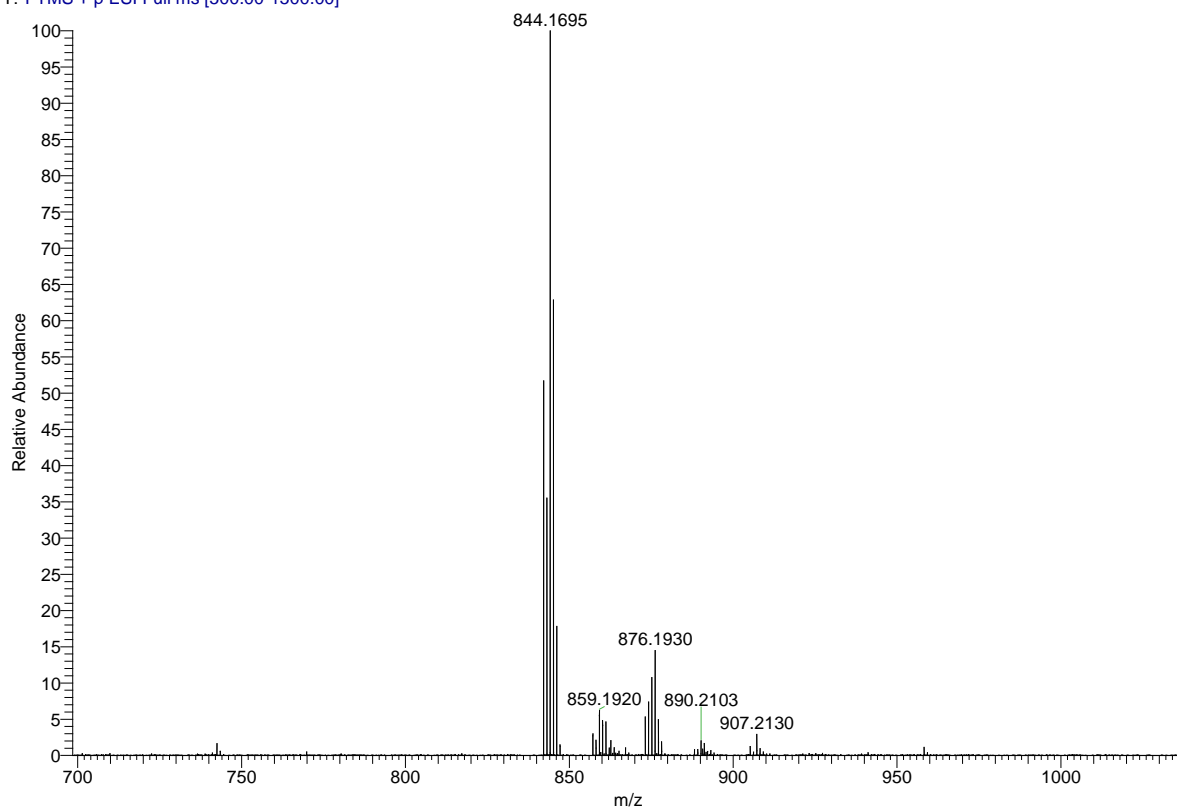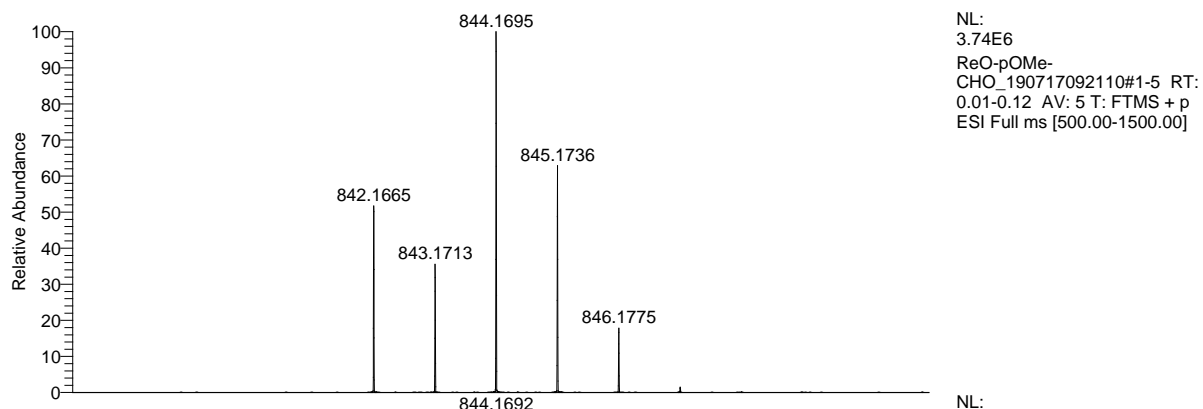

NL:  
3.74E6  
ReO-pOMe-  
CHO\_190717092110#1-5 RT:  
0.01-0.12 AV: 5 T: FTMS + p  
ESI Full ms [500.00-1500.00]

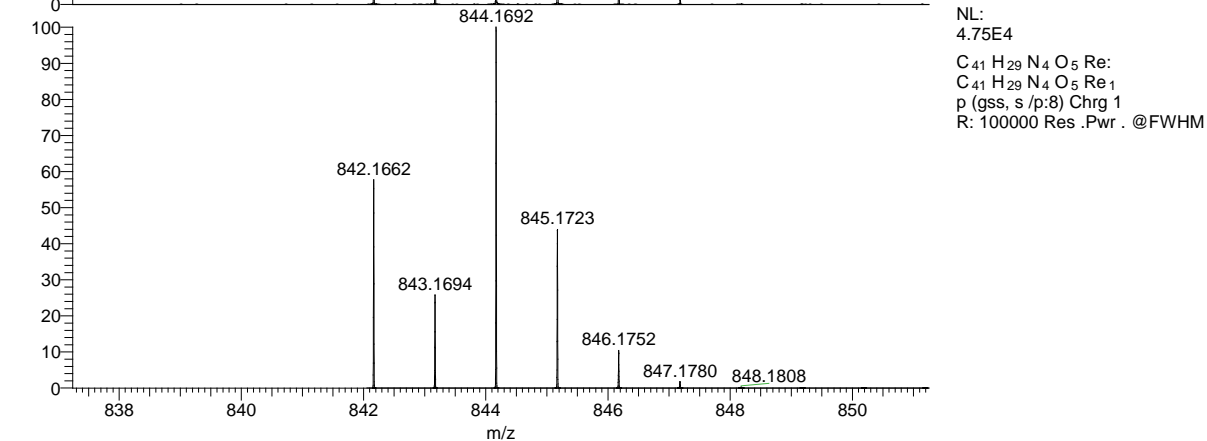

NL:  
4.75E4  
C<sub>41</sub> H<sub>29</sub> N<sub>4</sub> O<sub>5</sub> Re:  
C<sub>41</sub> H<sub>29</sub> N<sub>4</sub> O<sub>5</sub> Re<sub>1</sub>  
p (gss, s /p:8) Chrg 1  
R: 100000 Res .Pwr . @FWHM

Figure S21. HRMS-ESI mass spectra of Re[*Tp*OCH<sub>3</sub>PC-3-CHO](O).

ReOpOMeCNCOOH\_neg #1-3 RT: 0.01-0.07 AV: 3 NL: 1.07E6  
T: FTMS - p ESI Full ms [100.00-1500.00]

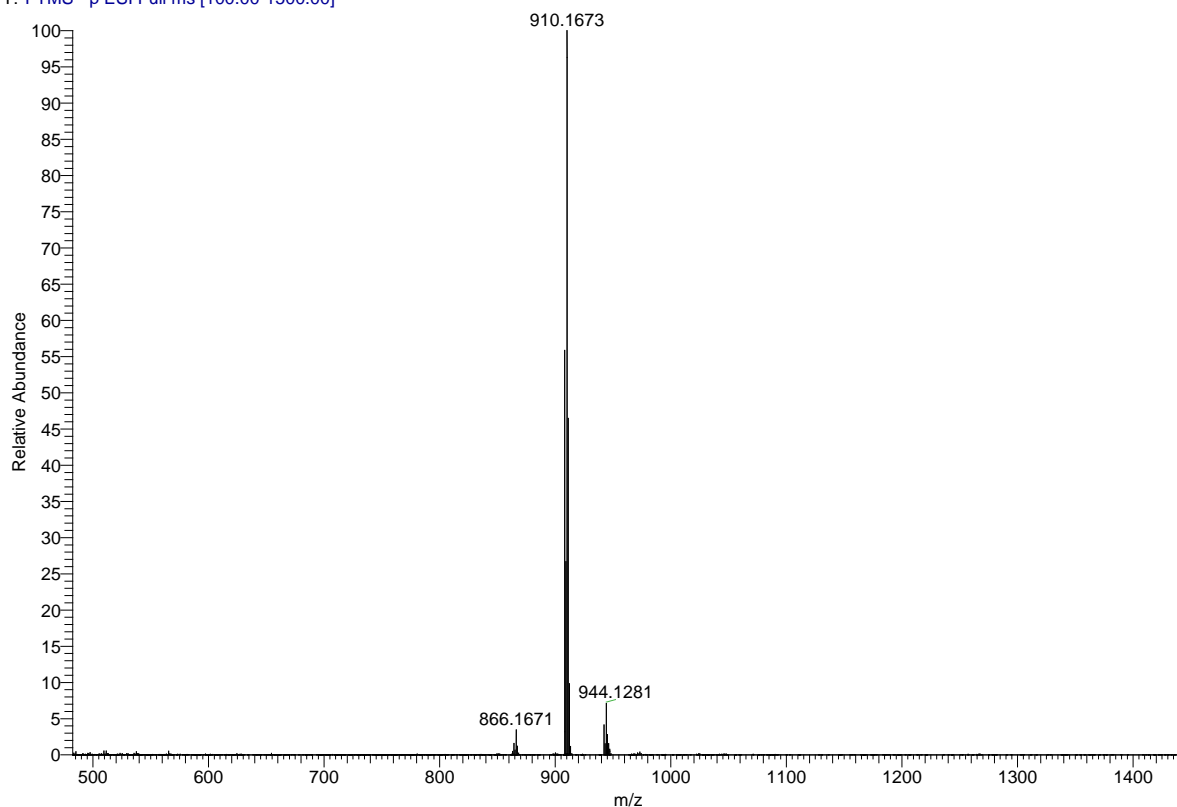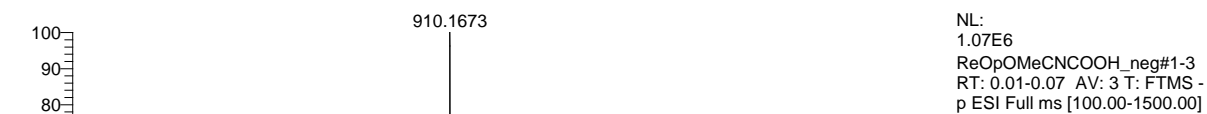

NL:  
1.07E6  
ReOpOMeCNCOOH\_neg#1-3  
RT: 0.01-0.07 AV: 3 T: FTMS -  
p ESI Full ms [100.00-1500.00]

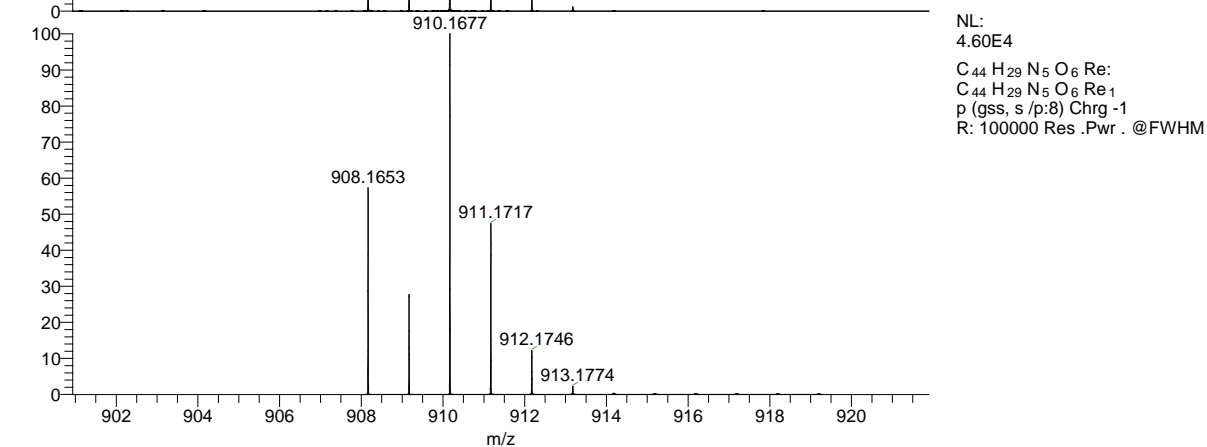

NL:  
4.60E4  
C<sub>44</sub> H<sub>29</sub> N<sub>5</sub> O<sub>6</sub> Re:  
C<sub>44</sub> H<sub>29</sub> N<sub>5</sub> O<sub>6</sub> Re<sub>1</sub>  
p (gss, s /p:8) Chrg -1  
R: 100000 Res .Pwr . @FWHM

Figure S22. HRMS-ESI mass spectra of Re[*Tp*OCH<sub>3</sub>PC-3-CH(CN)COOH](O).

ReO-pCF<sub>3</sub>-CHO #1-10 RT: 0.01-0.16 AV: 10 NL: 1.85E6  
T: FTMS - p ESI Full ms [300.00-1500.00]

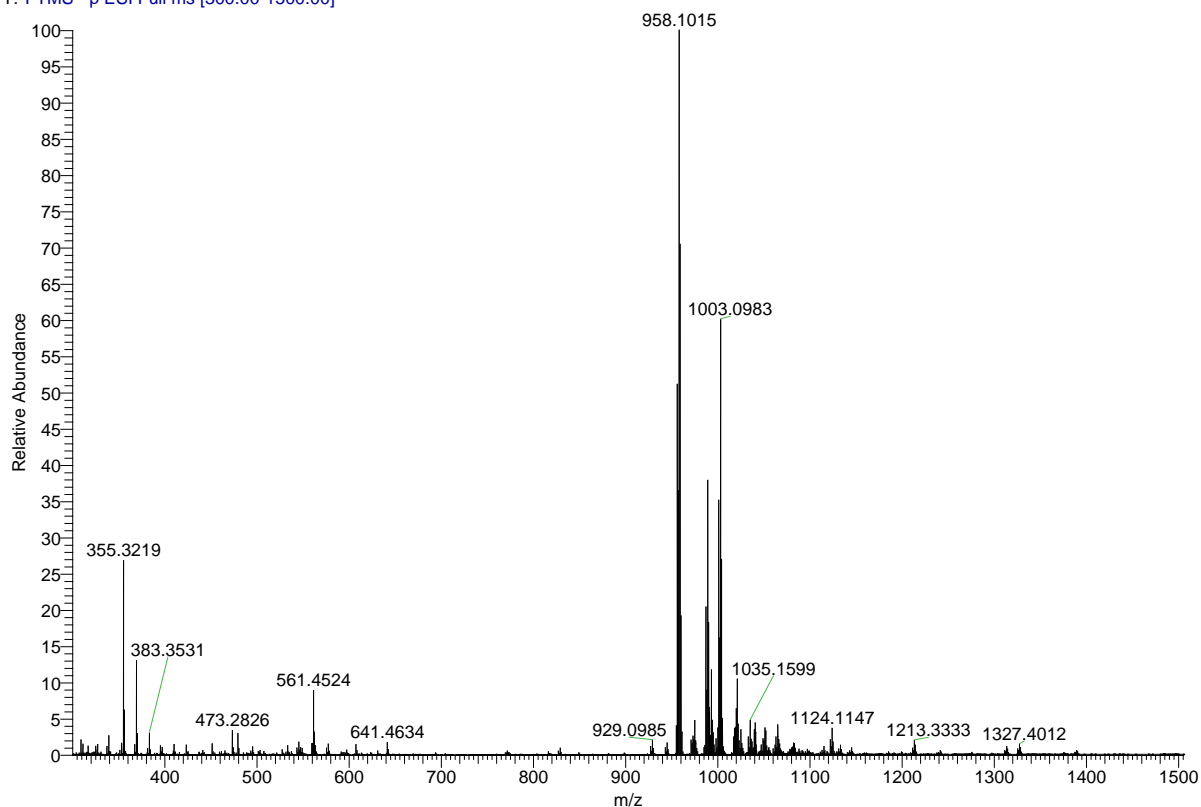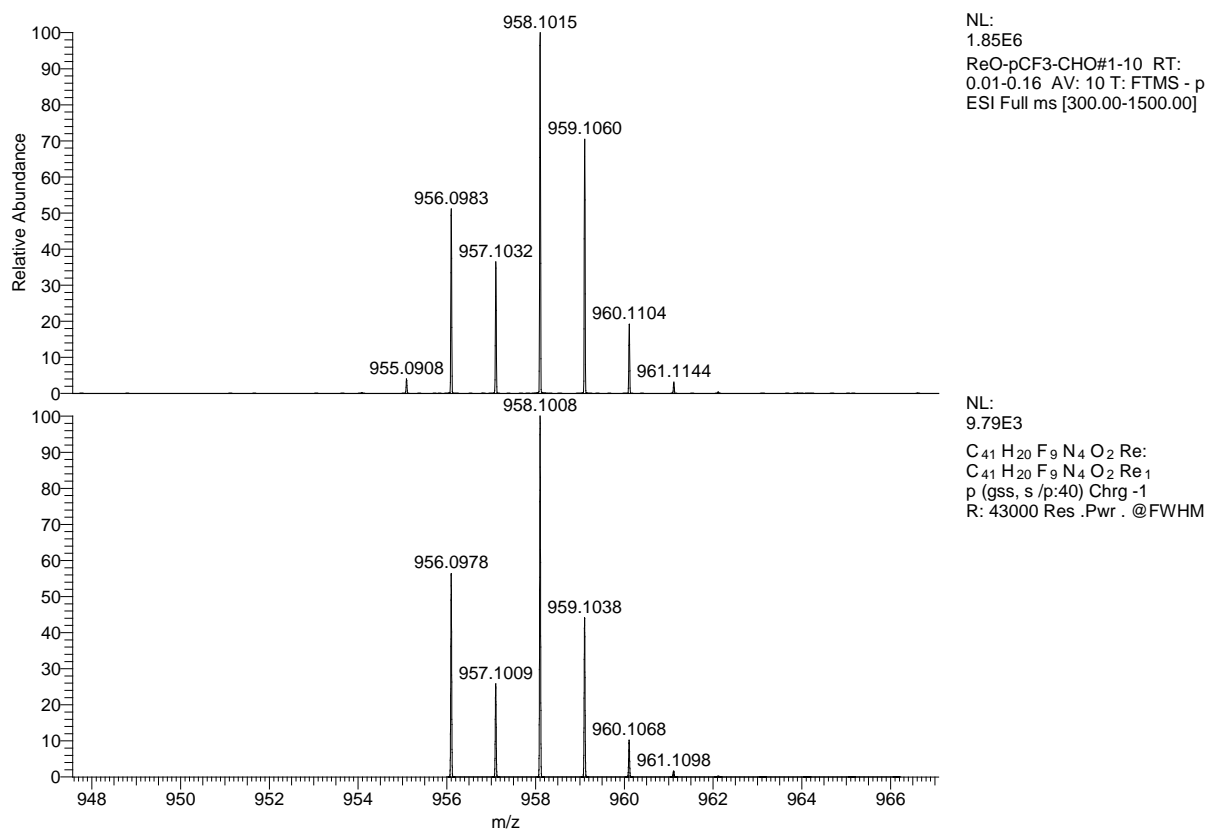

Figure S23. HRMS-ESI mass spectra of Re[*Tp*CF<sub>3</sub>PC-3-CHO](O).



Au-TPC-mono-formyl\_190409110618 #1-4 RT: 0.02-0.12 AV: 4 NL: 3.54E5  
T: FTMS + p ESI Full ms [300.00-1500.00]

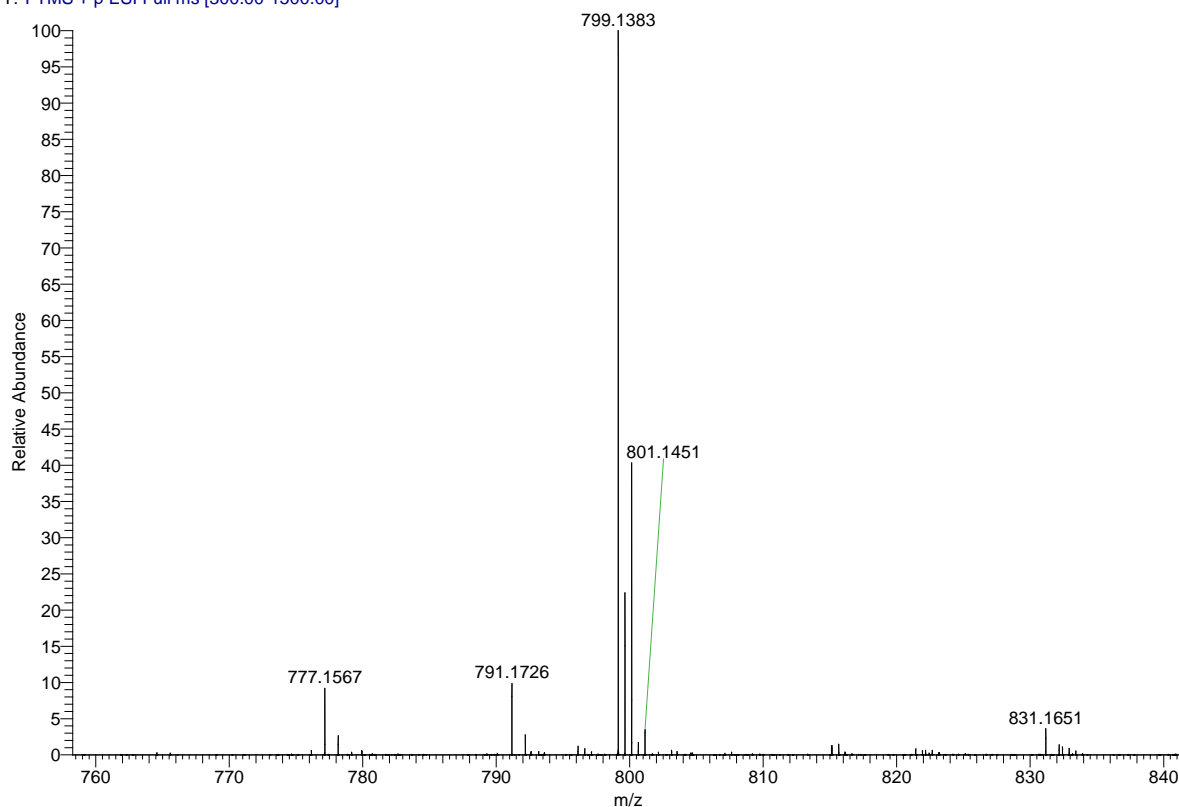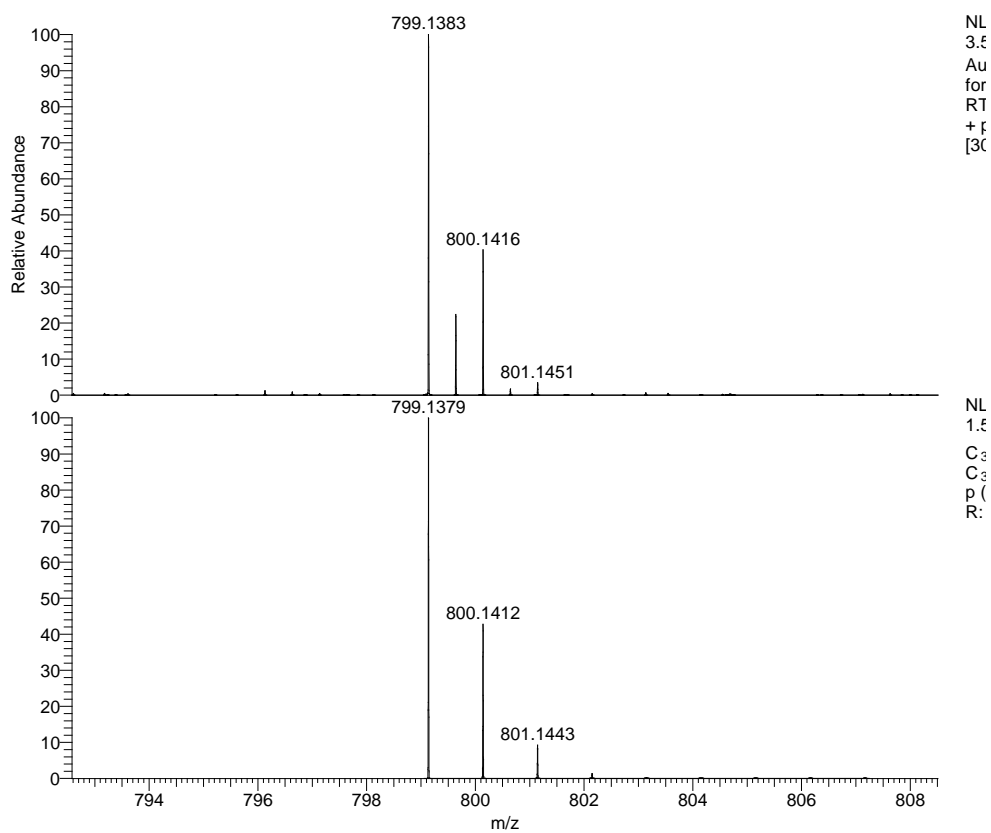

**Figure S24.** HRMS-ESI mass spectrum of Au[TPC-3,17-(CHO)<sub>2</sub>].

Au-p-Me-monoformyl #1-4 RT: 0.02-0.10 AV: 4 NL: 2.58E6  
T: FTMS + p ESI Full ms [200.00-1500.00]

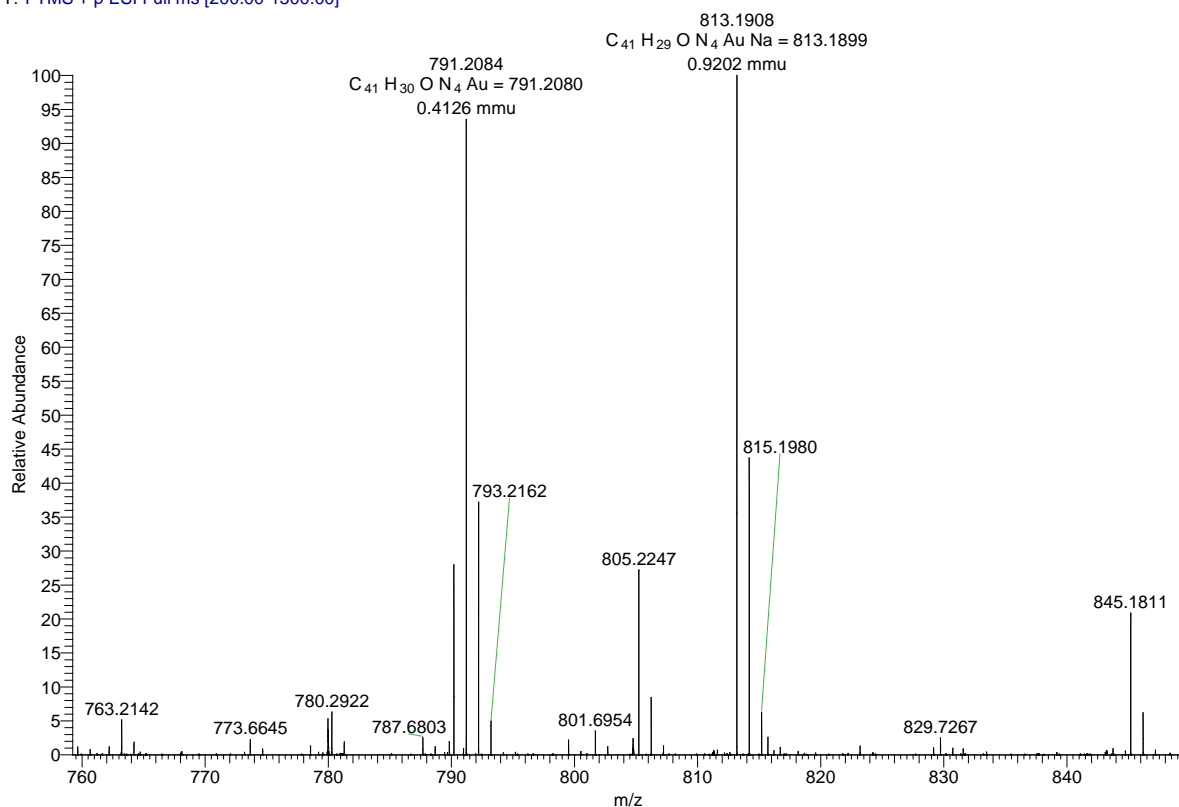

**Figure S25.** HRMS-ESI mass spectrum of Au[ *Tp* CH<sub>3</sub>PC-3-CHO].

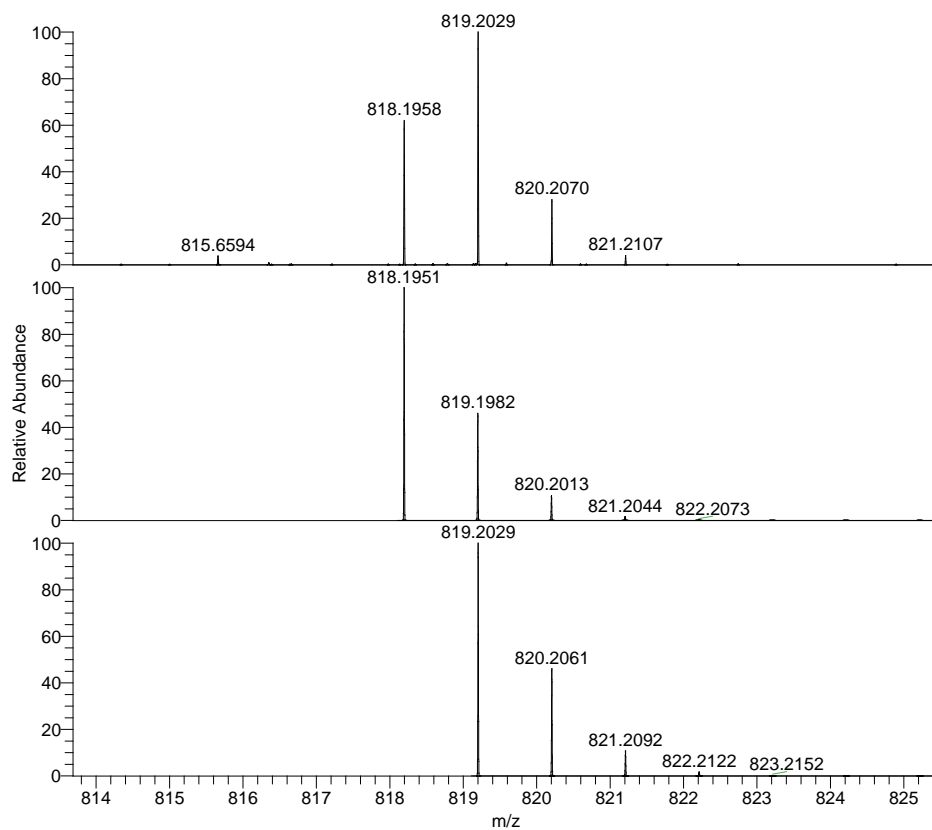

**Figure S26.** HRMS-ESI mass spectrum of Au[ *Tp* CH<sub>3</sub>PC-3,17-(CHO)<sub>2</sub>].

AupOMeCHO2\_Na-b #2 RT: 0.03 AV: 1 NL: 5.21E6  
T: FTMS + p ESI Full ms [100.00-1500.00]

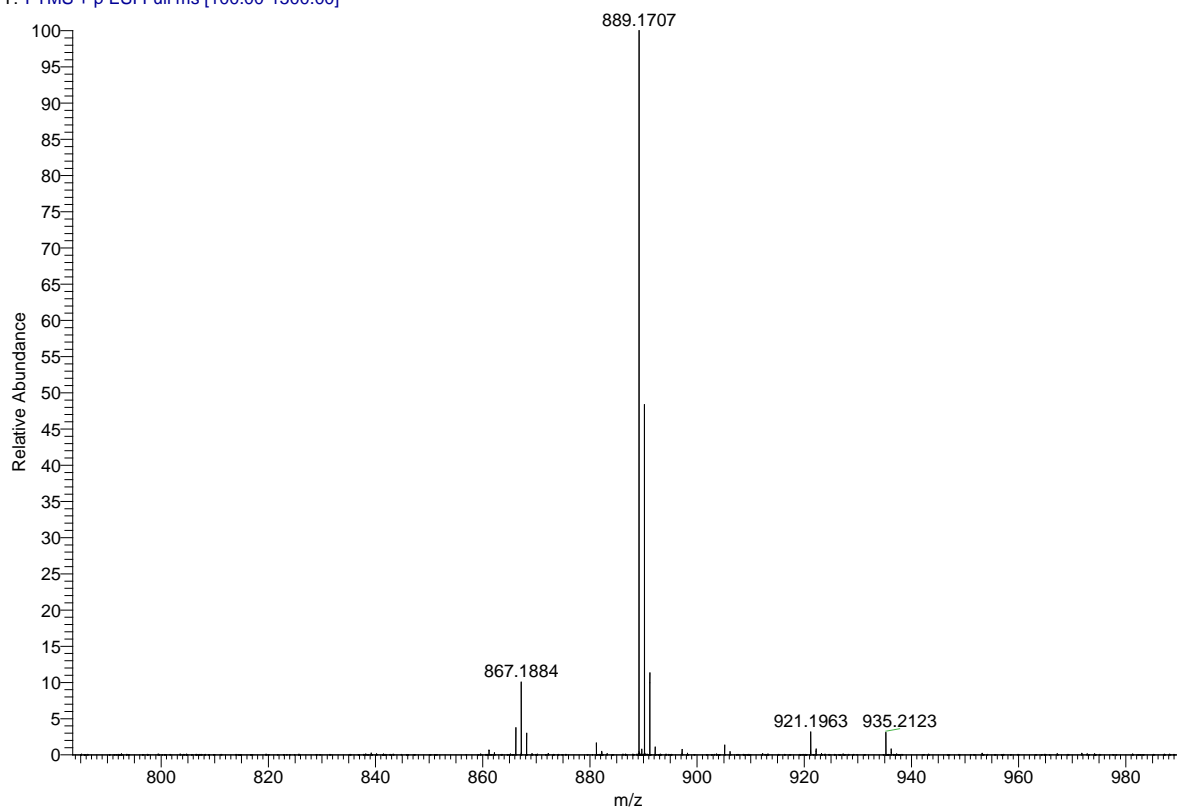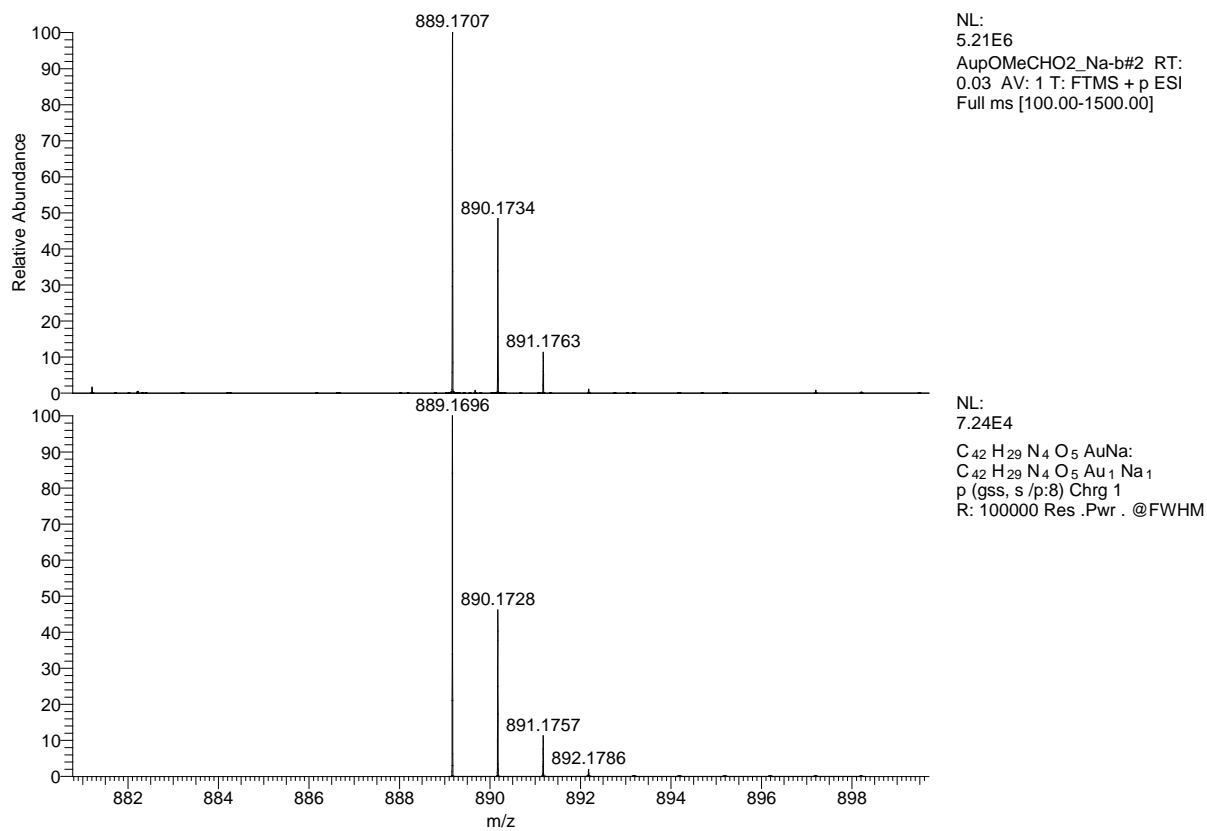

Figure S27. HRMS-ESI mass spectrum of Au[TpOCH<sub>3</sub>PC-3,17-(CHO)<sub>2</sub>].

### C. $^1\text{H}$ NMR spectra

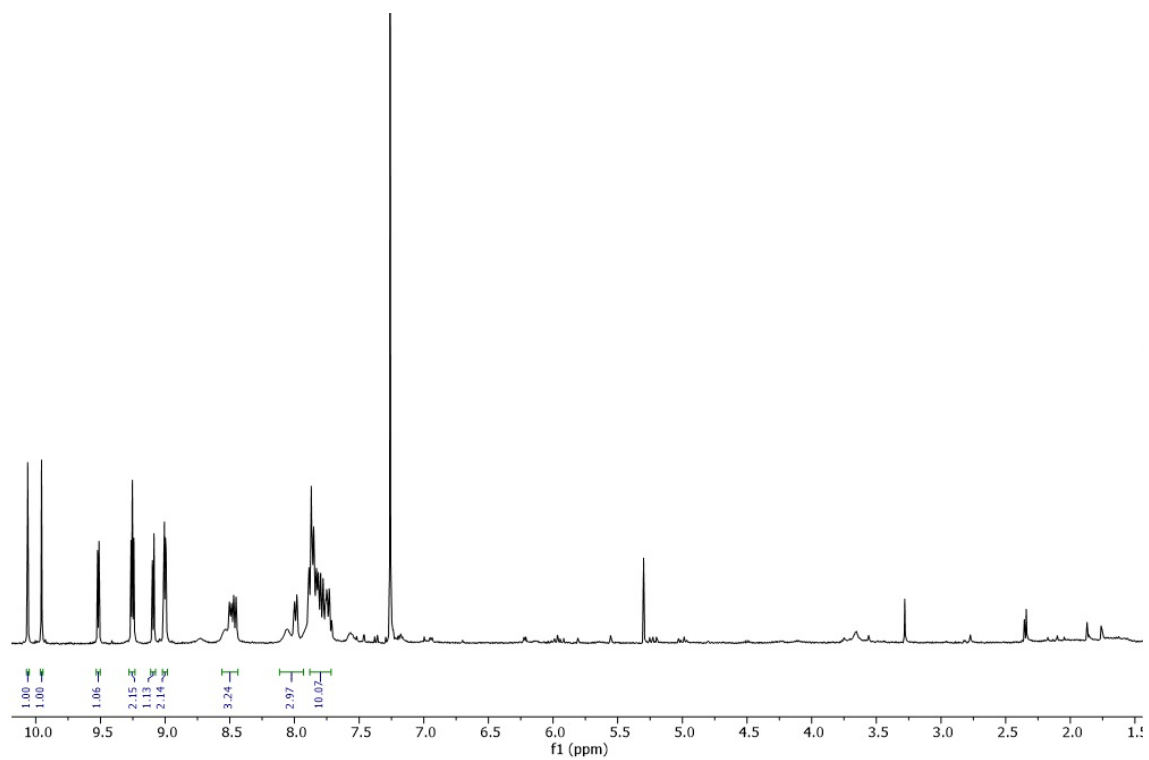

**Figure S28.**  $^1\text{H}$  NMR spectrum of  $\text{Re}[\text{TPC-3-CHO}](\text{O})$  at  $-20^\circ\text{C}$ .

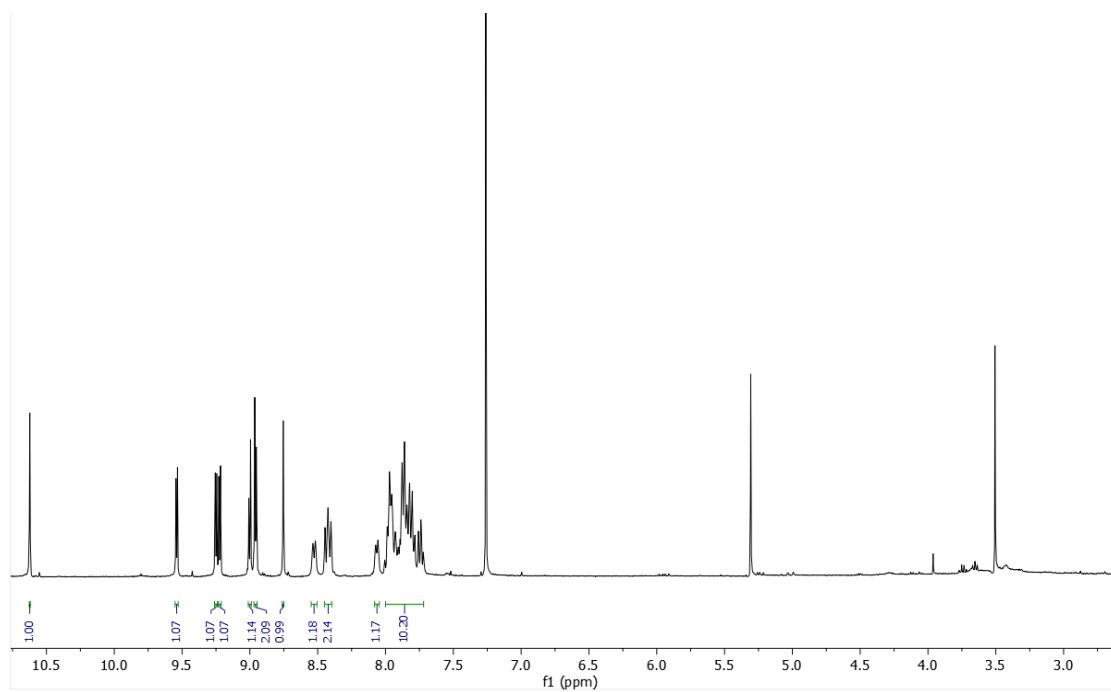

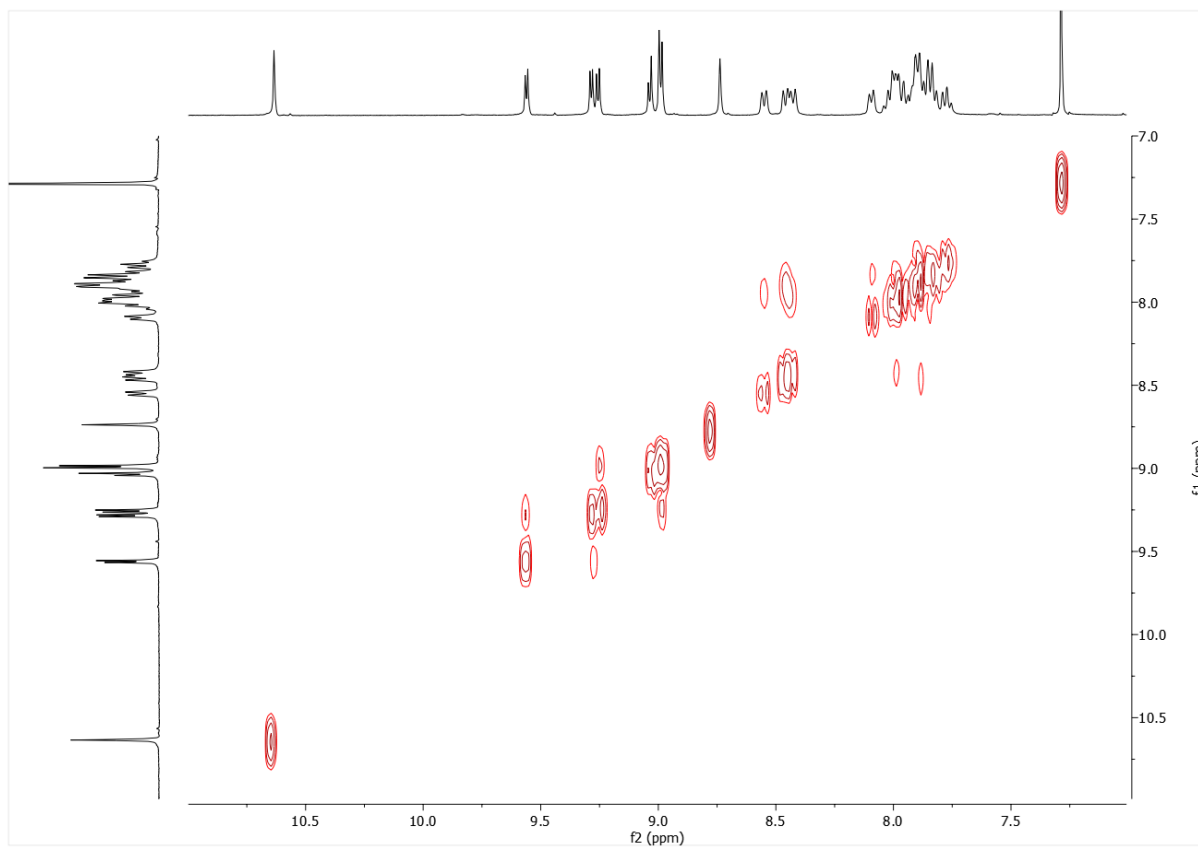

**Figure S29.**  $^1\text{H}$  NMR and  $^1\text{H}$ — $^1\text{H}$  COSY spectra of  $\text{Re}[\text{TPC-3-CH}(\text{CN})\text{COOH}](\text{O})$  at  $-20^\circ\text{C}$ .

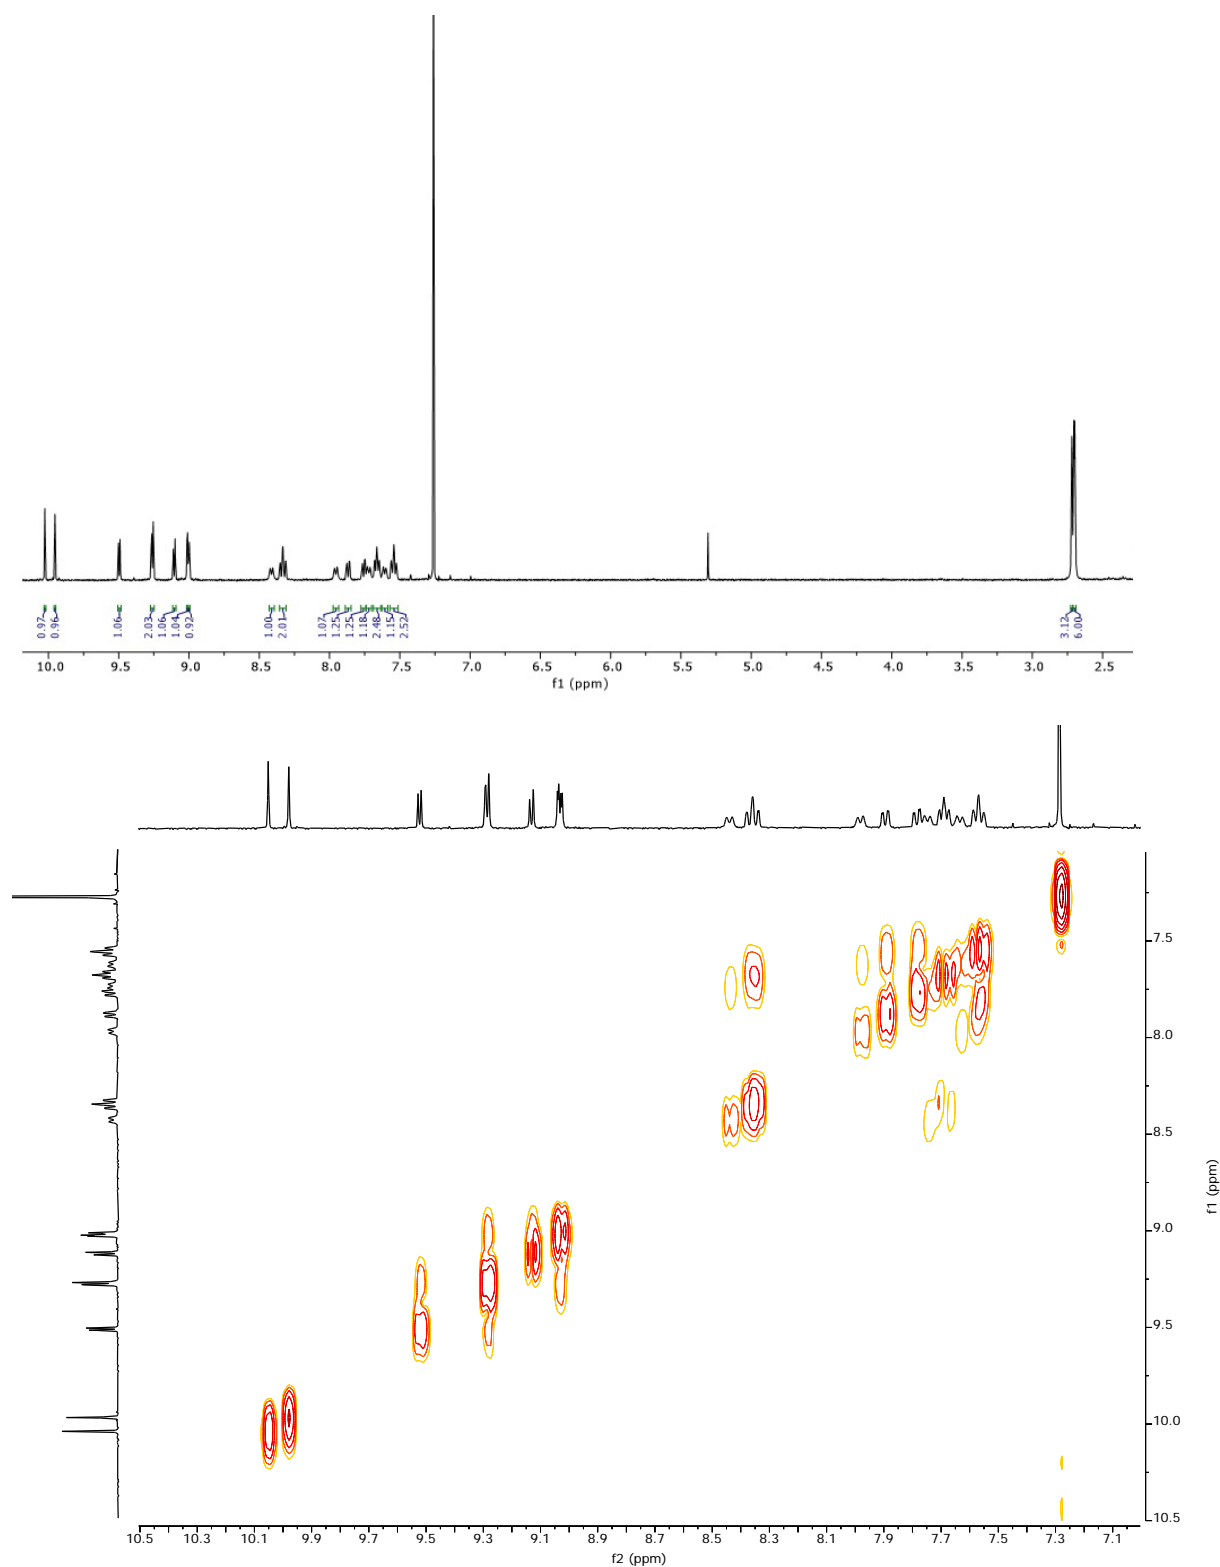

**Figure S30.**  $^1\text{H}$  NMR and  $^1\text{H}$ - $^1\text{H}$  COSY spectrum of  $\text{Re}[\text{TpCH}_3\text{PC-3-CHO}](\text{O})$  at  $-20^\circ\text{C}$ .

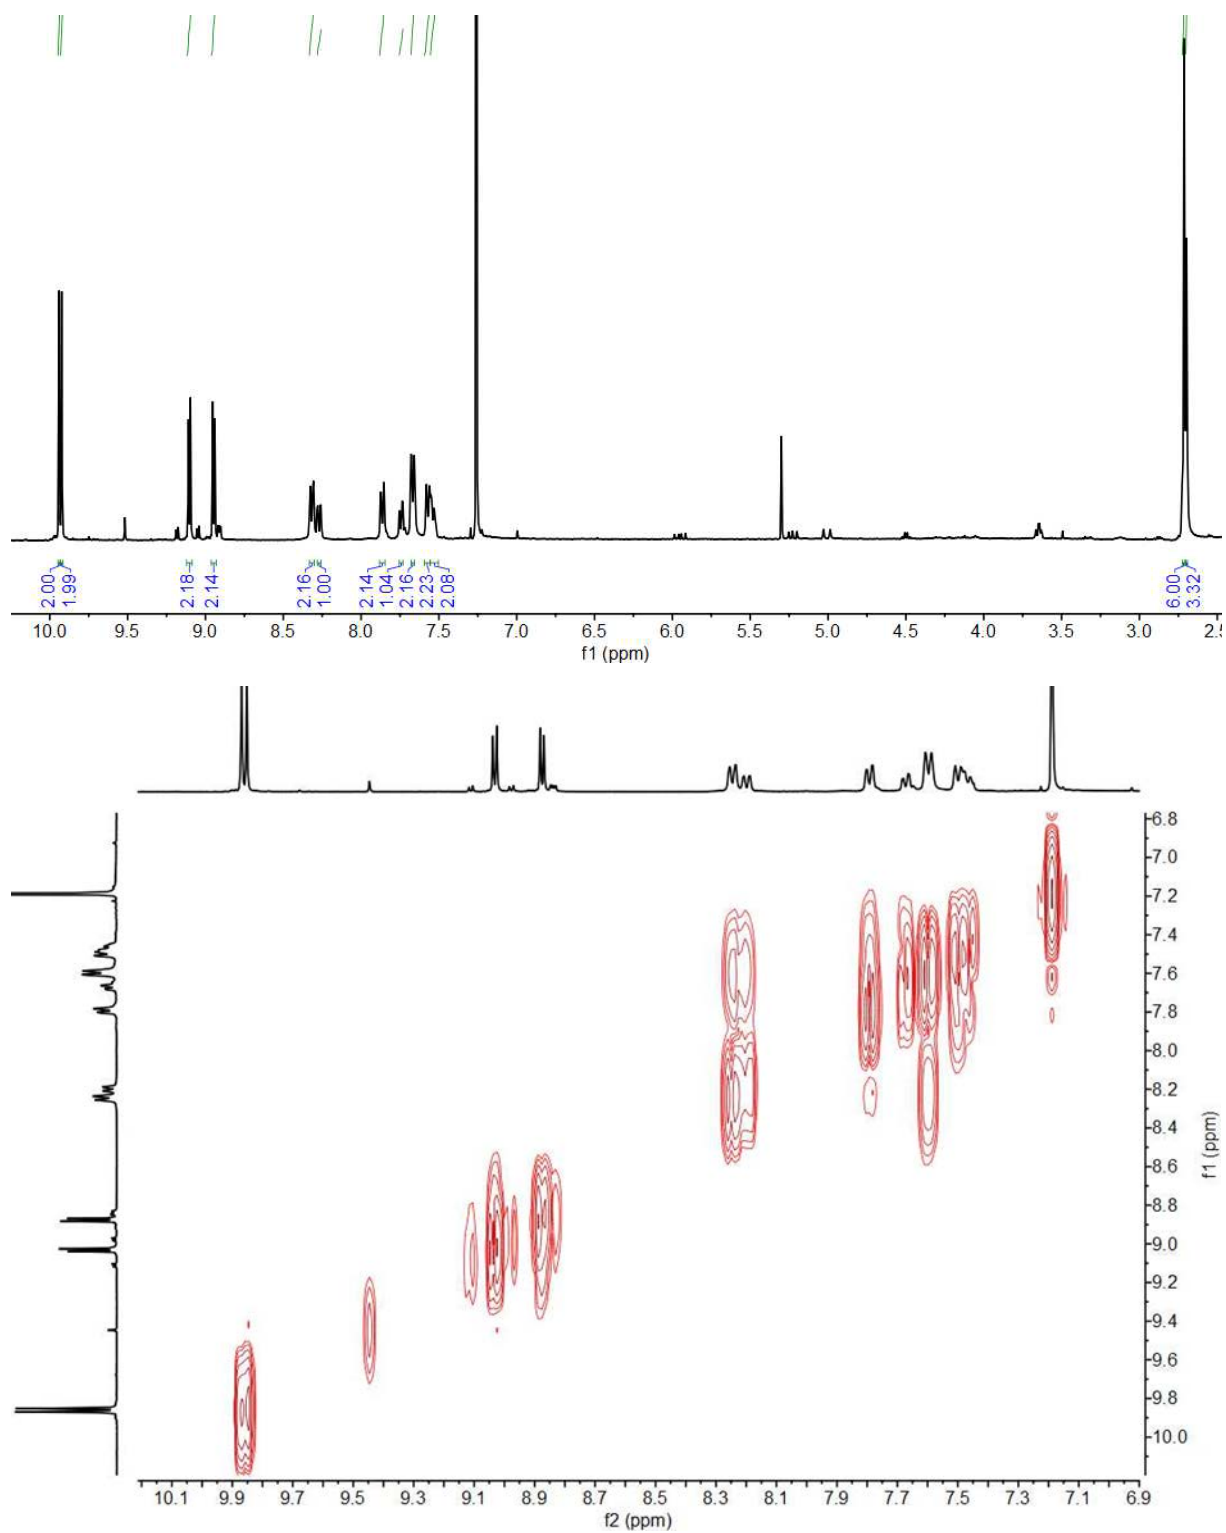

**Figure S31.**  $^1\text{H}$  NMR and  $^1\text{H}$ — $^1\text{H}$  COSY spectra of  $\text{Re}[\text{TpCH}_3\text{PC-3,17-(CHO)}_2](\text{O})$  at  $-20^\circ\text{C}$ .

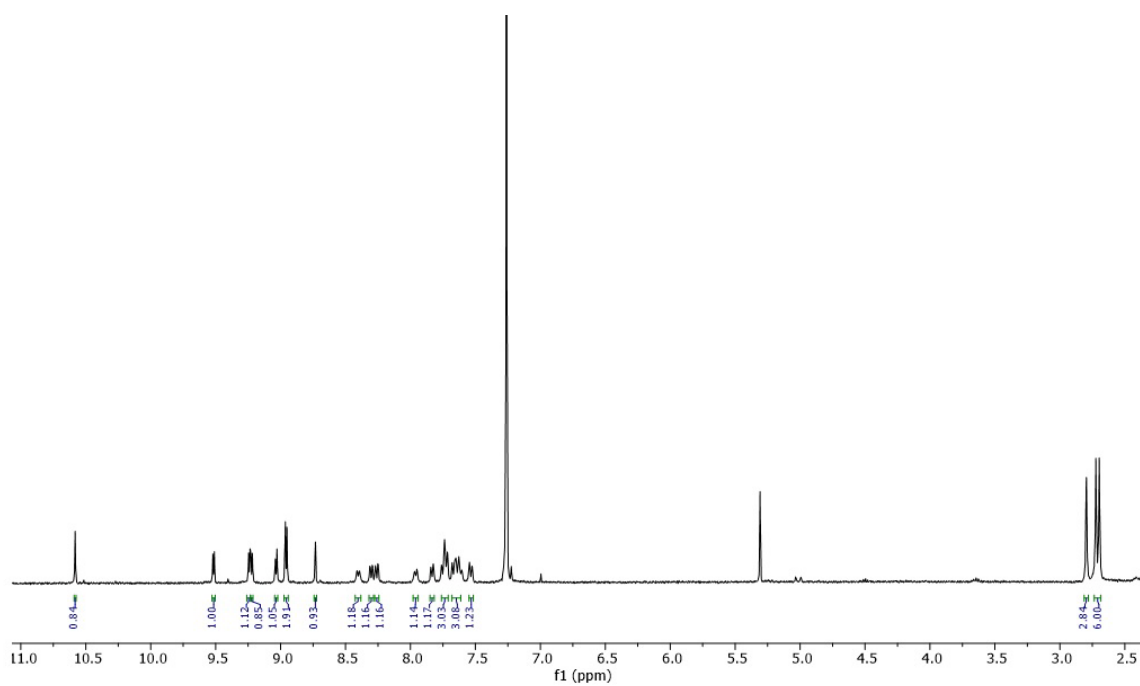

**Figure S32.**  $^1\text{H}$  NMR spectrum of  $\text{Re}[\text{TpCH}_3\text{PC-3-CH}(\text{CN})\text{COOH}](\text{O})$  in  $\text{CDCl}_3$  at  $-20^\circ\text{C}$ .



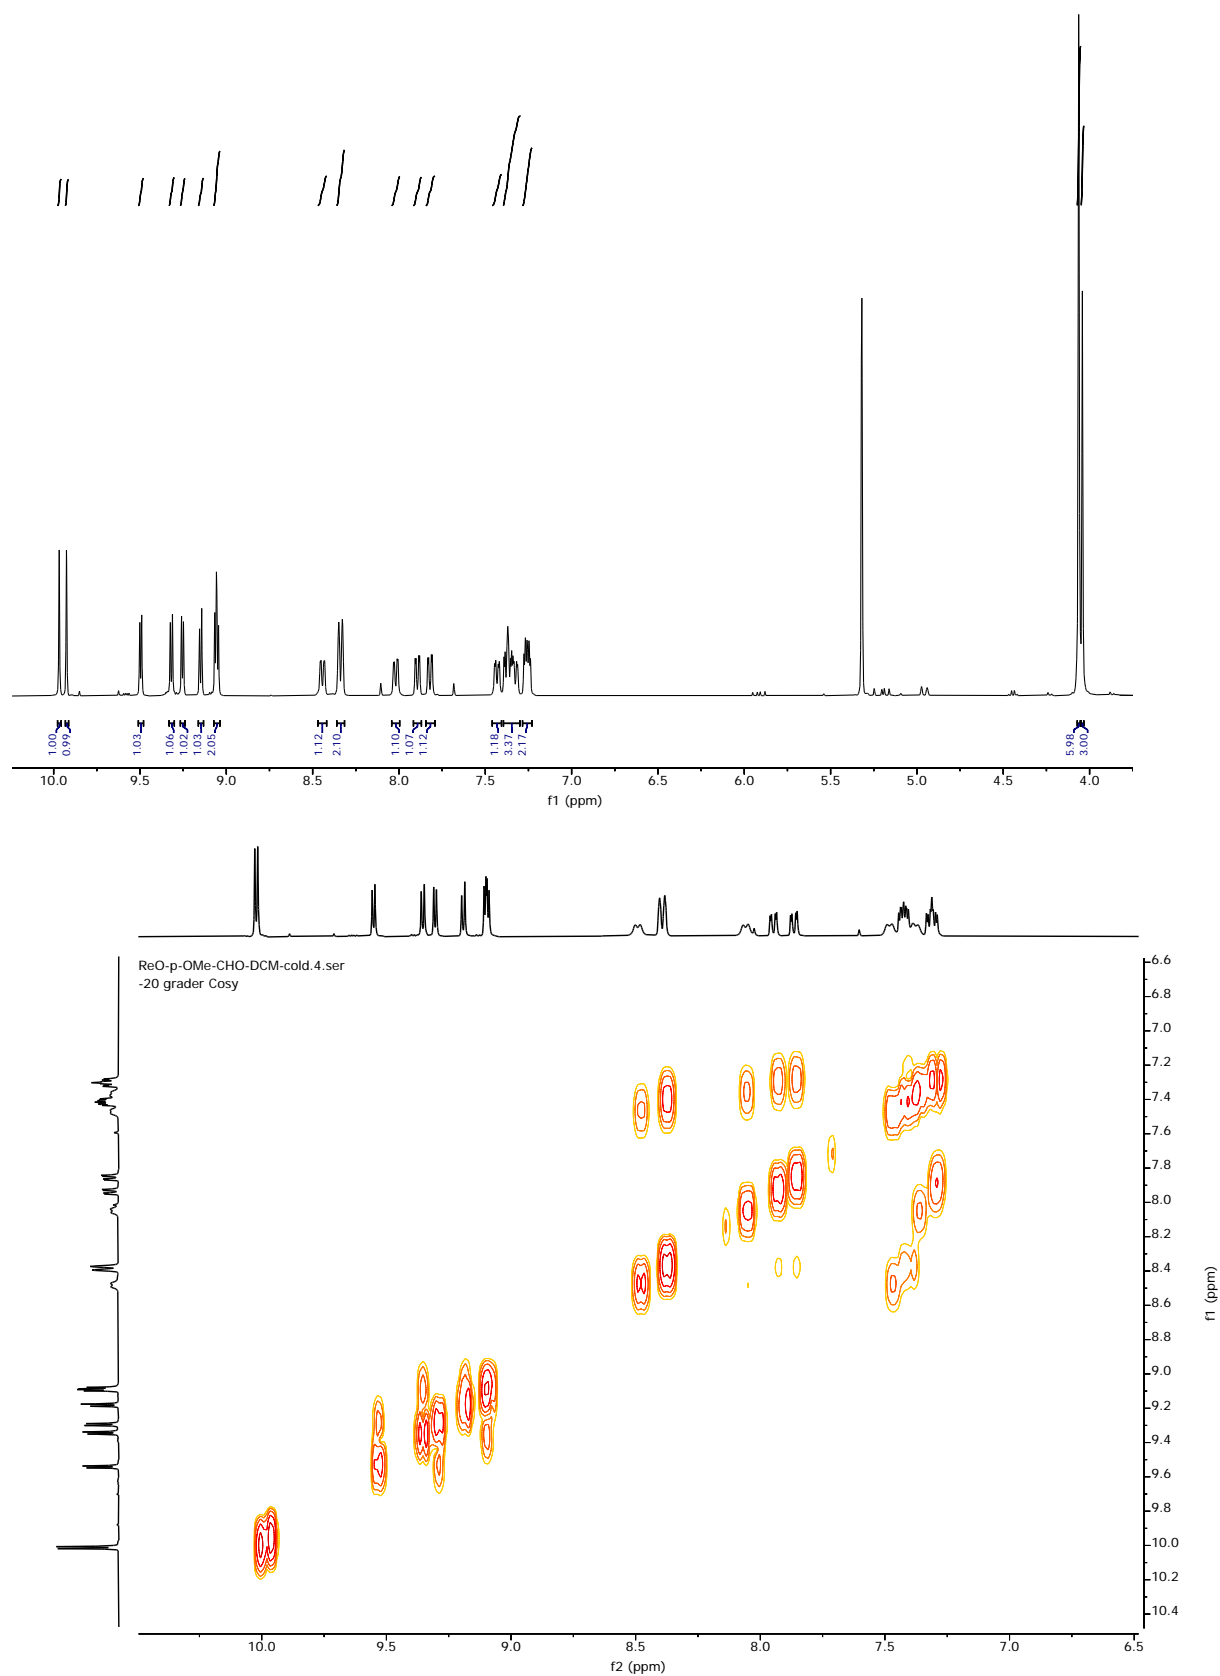

**Figure S33.**  $^1\text{H}$  NMR and  $^1\text{H}$ — $^1\text{H}$  COSY spectra of  $\text{Re}[\text{TpOCH}_3\text{PC-3-CHO}](\text{O})$  in  $\text{CDCl}_3$  at  $-20^\circ\text{C}$ .

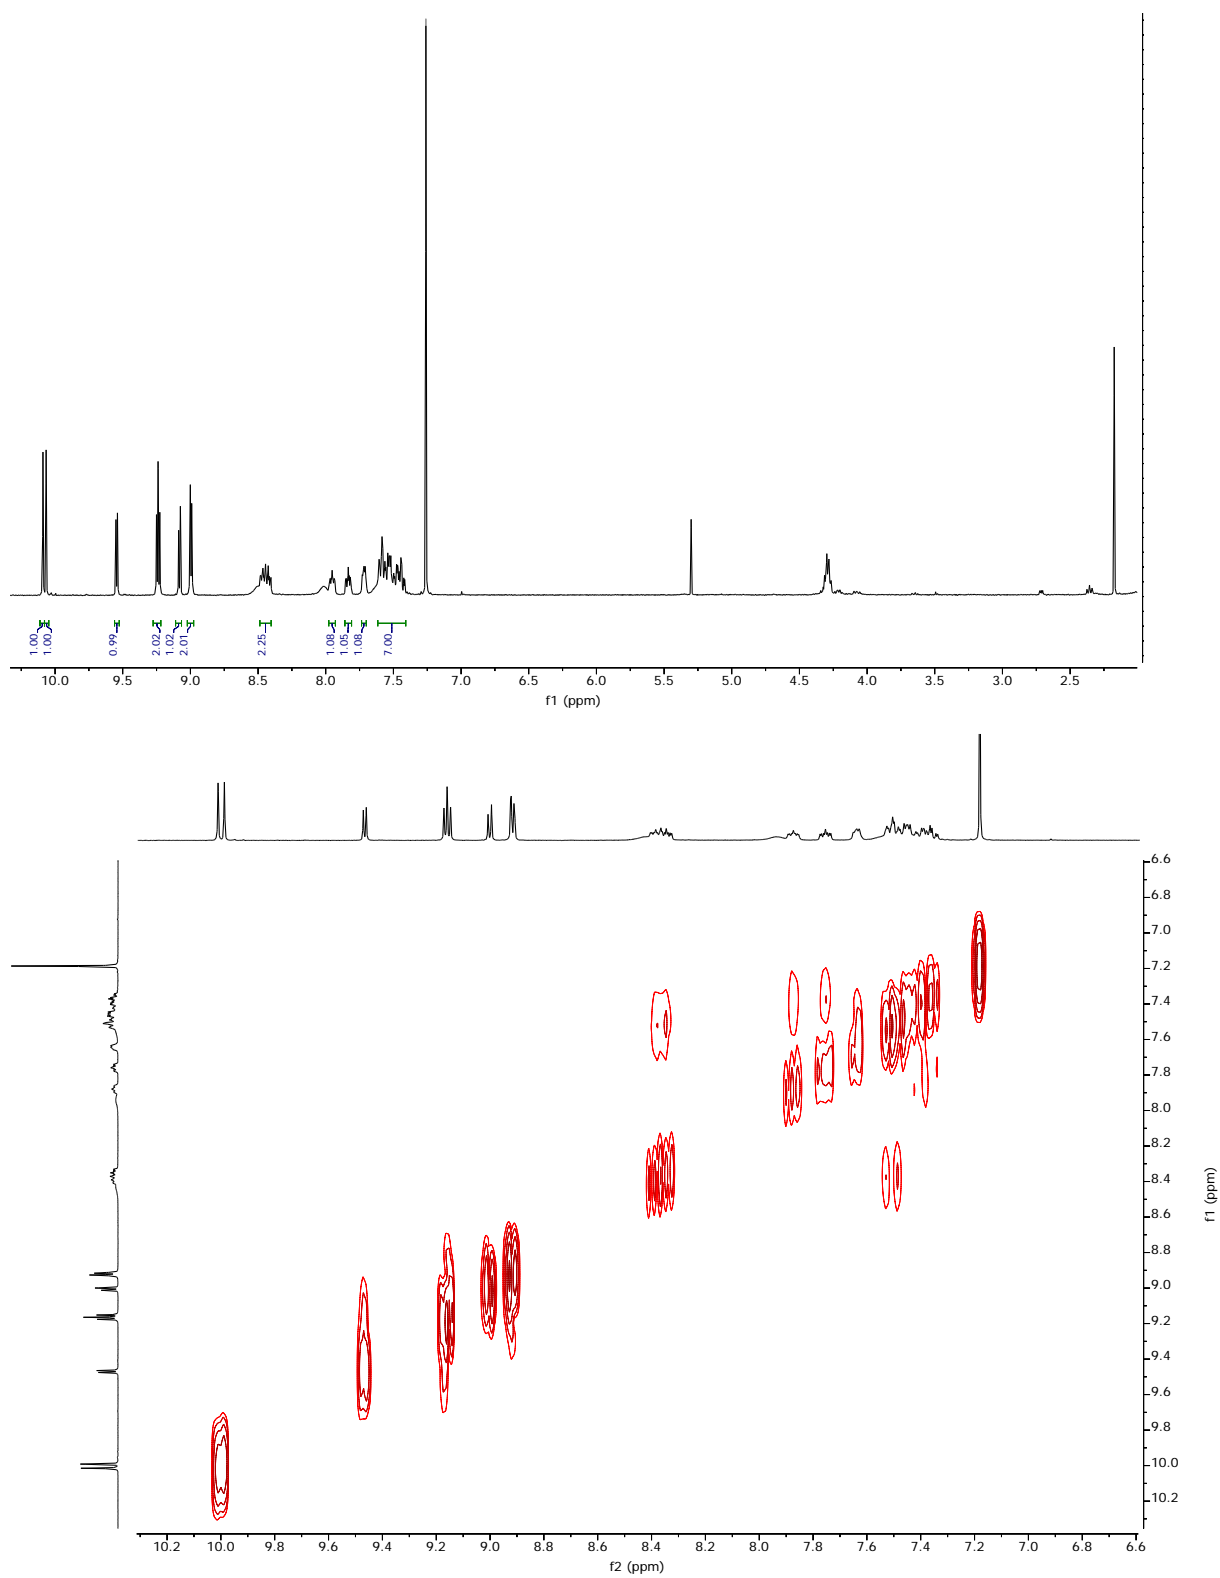

**Figure S34.**  $^1\text{H}$  NMR and  $^1\text{H}$ - $^1\text{H}$  COSY spectra of  $\text{Re}[\text{TpFPC-3-CHO}]\text{O}$  in  $\text{CDCl}_3$  at  $20^\circ\text{C}$ .

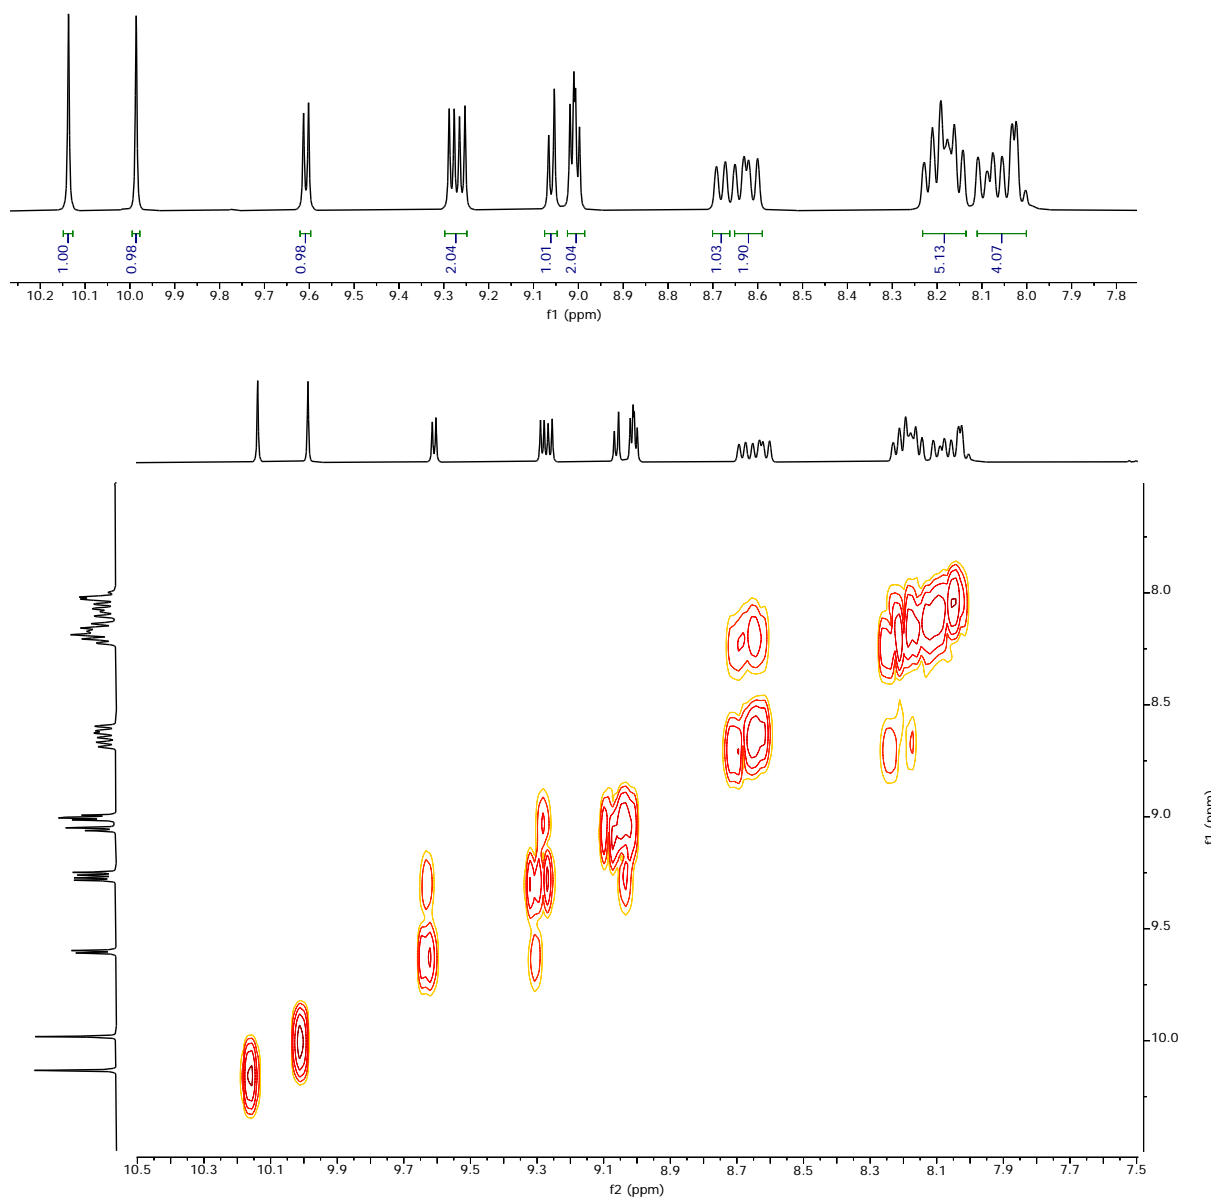

**Figure S35.**  $^1\text{H}$  NMR and  $^1\text{H}$ — $^1\text{H}$  COSY spectra of  $\text{Re}[\text{TpCF}_3\text{PC-3-CHO}]\text{O}$  in  $\text{CDCl}_3$  at  $-20^\circ\text{C}$ .

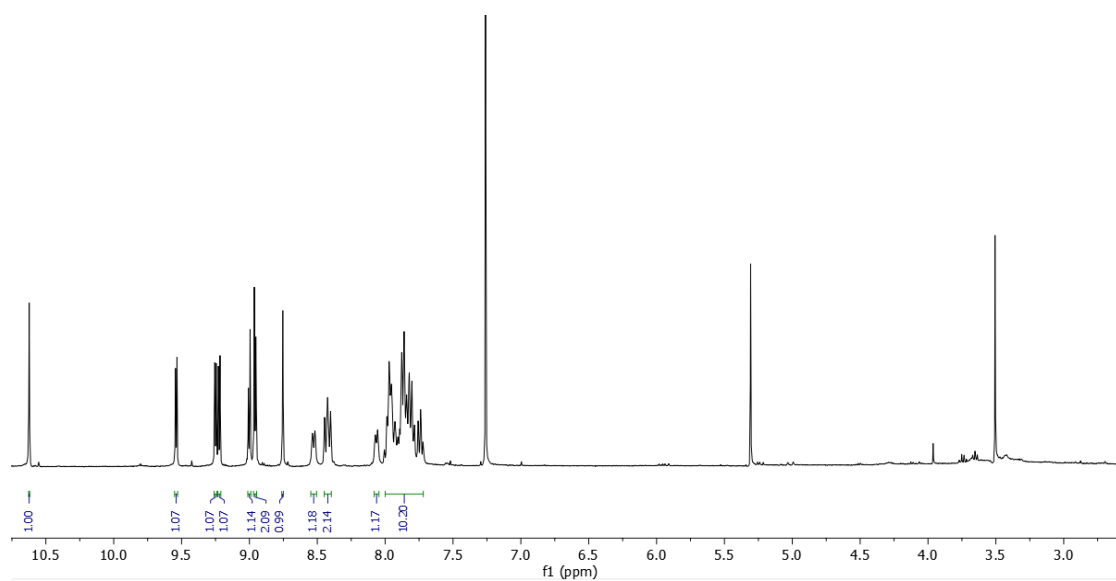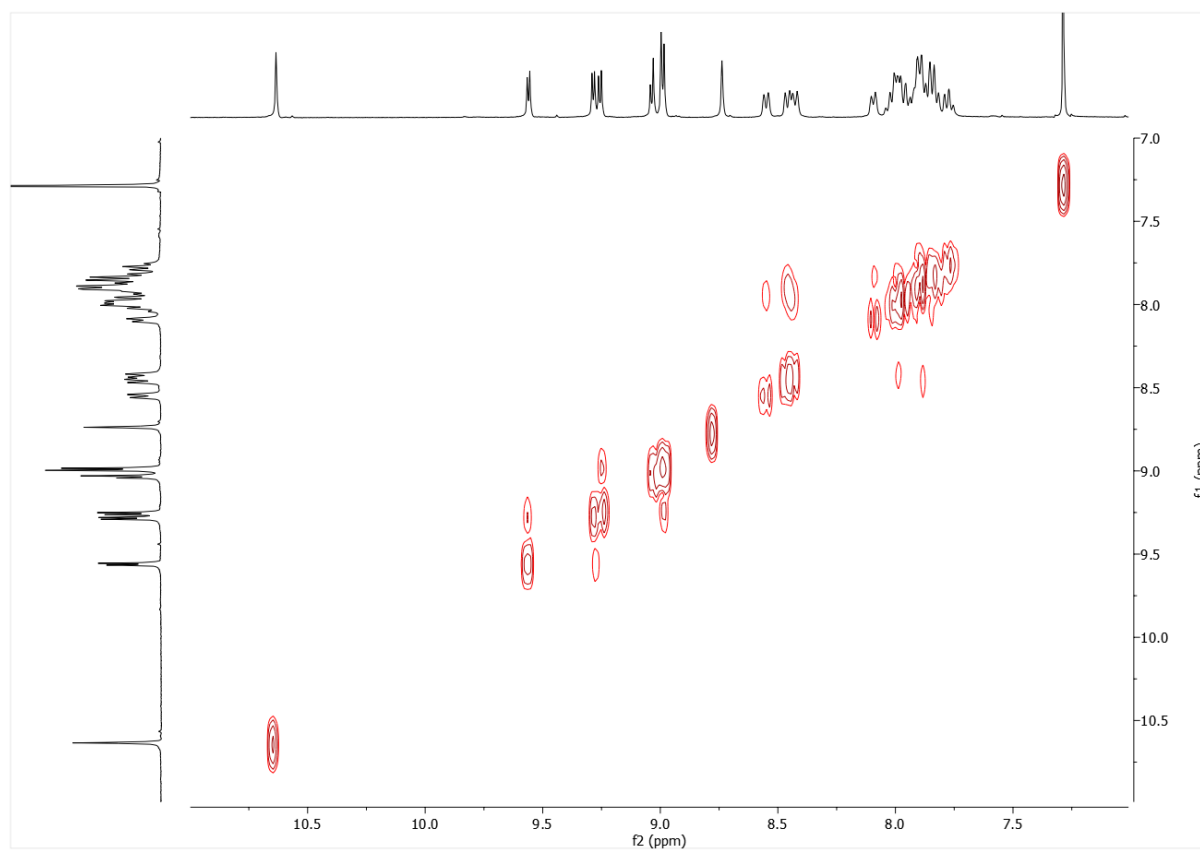

**Figure S36.**  $^1\text{H}$  NMR and  $^1\text{H}$ — $^1\text{H}$  COSY spectra of  $\text{Re}[\text{TPC-3-CH}(\text{CN})\text{COOH}](\text{O})$  in  $\text{CDCl}_3$  at  $-20^\circ\text{C}$ .

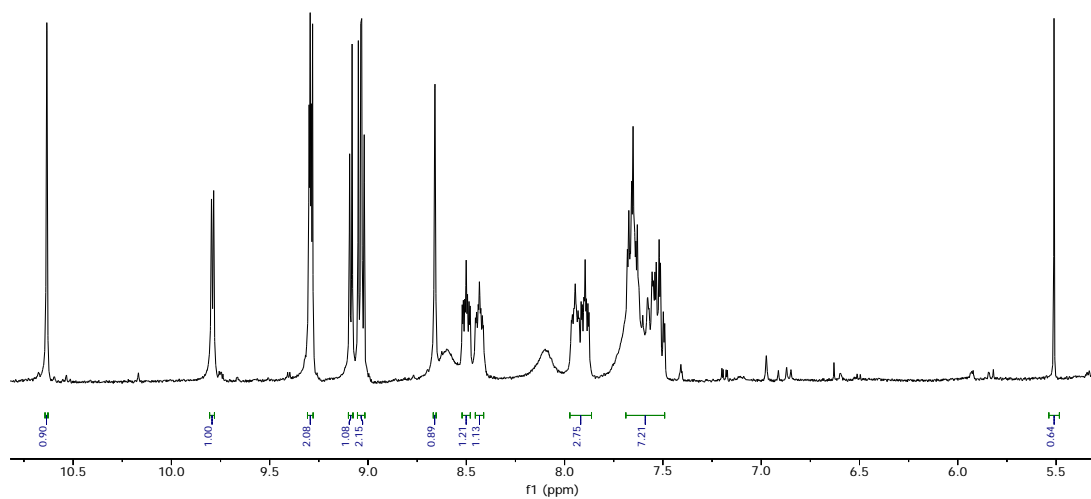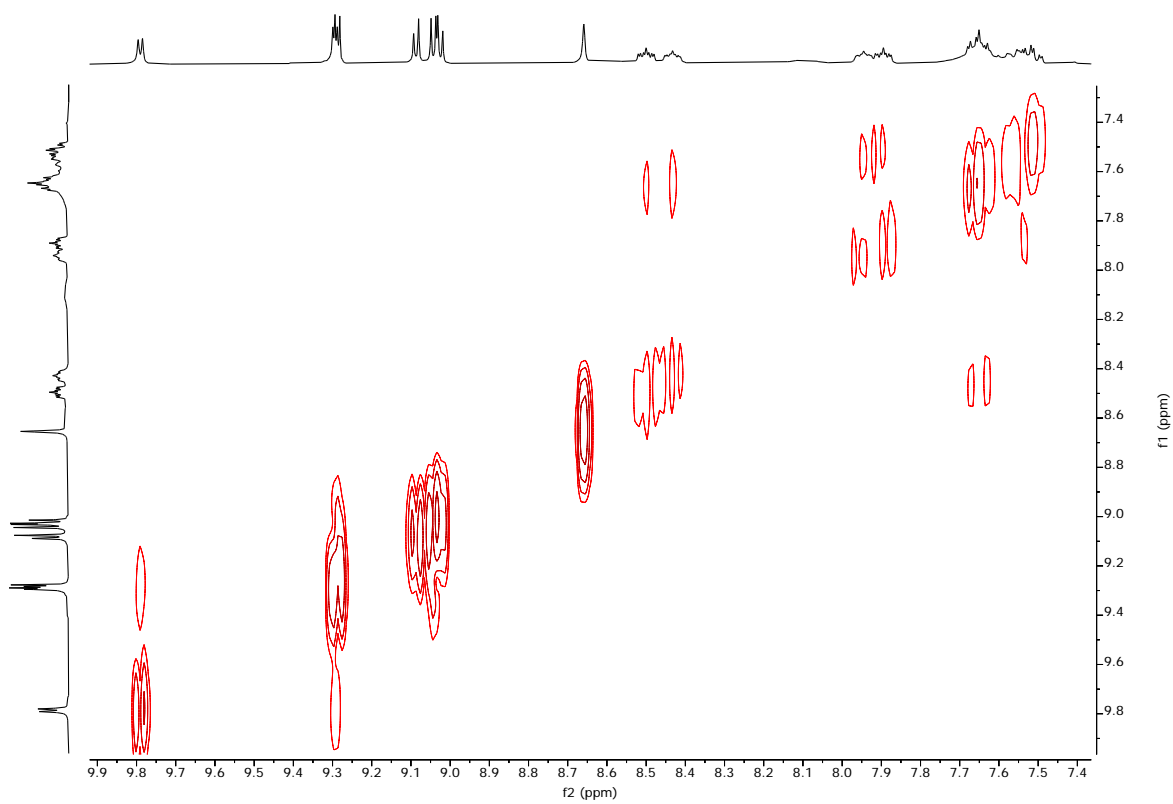

**Figure S37.** <sup>1</sup>H NMR and <sup>1</sup>H—<sup>1</sup>H COSY spectra of Re[TpFPC-3-(CN)COOH](O) in tetrahydrofuran-d<sub>8</sub> at 20°C.

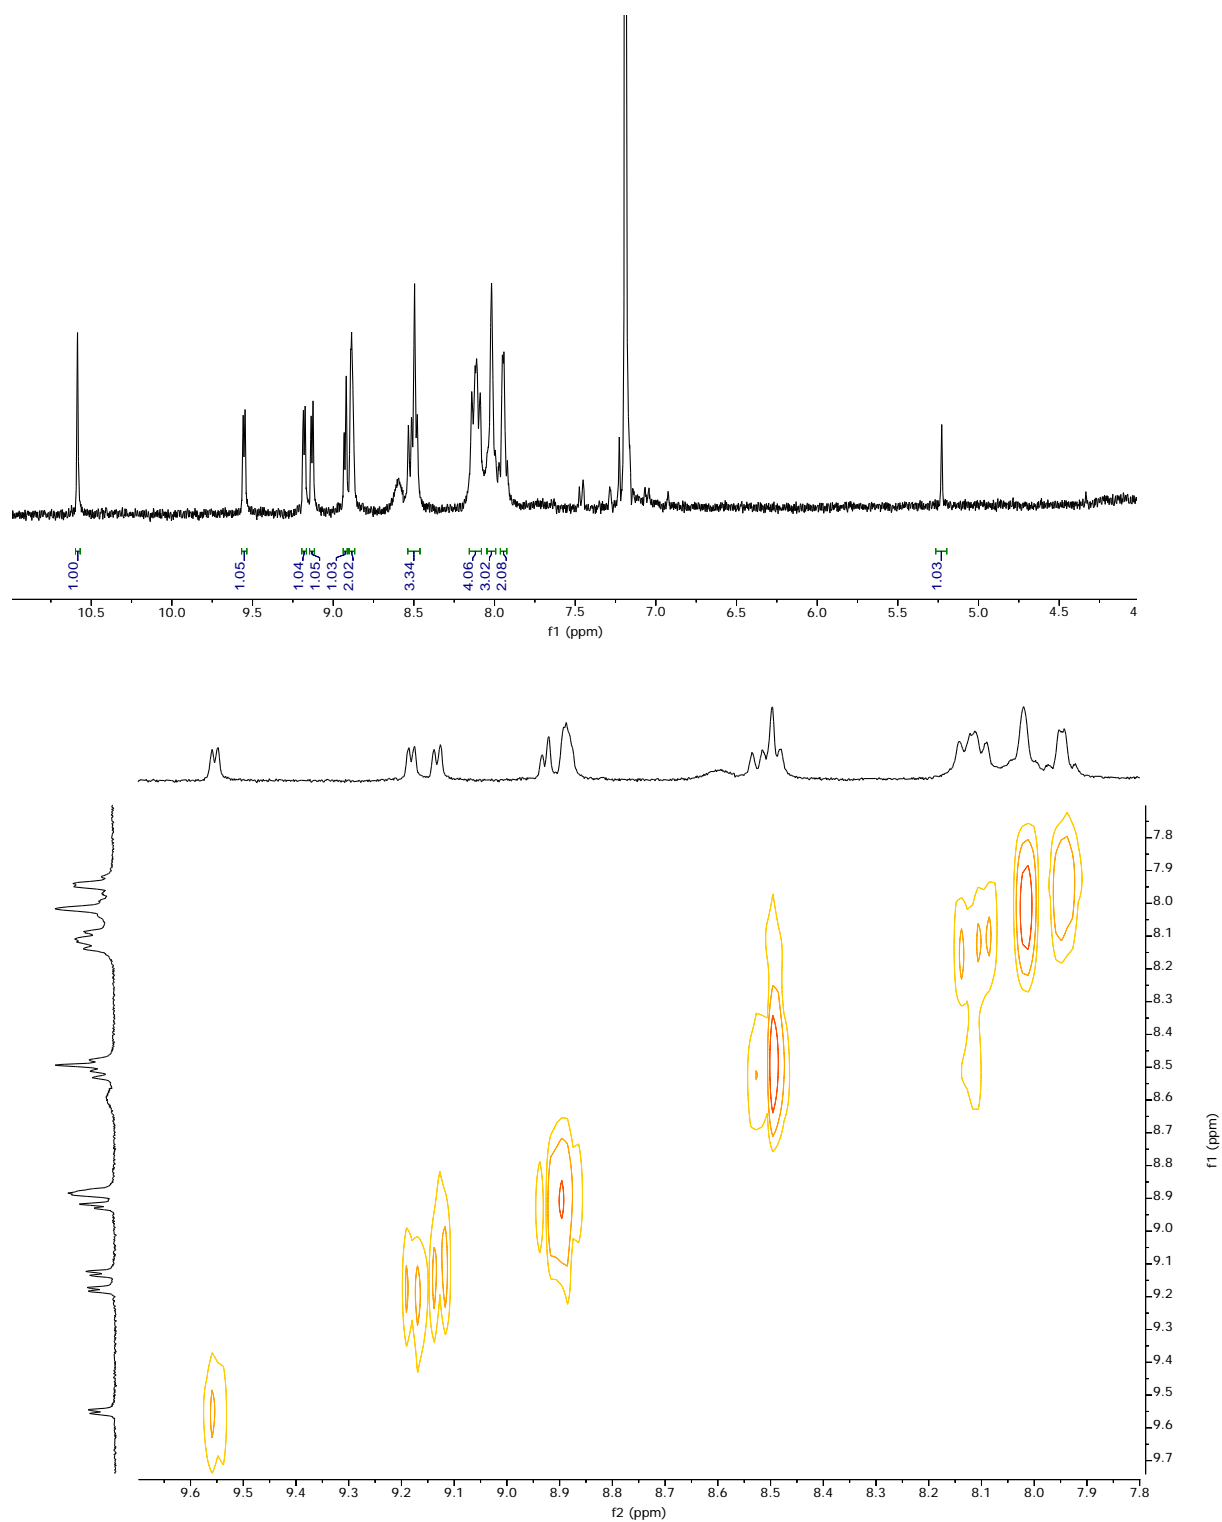

**Figure S38.**  $^1\text{H}$  NMR and  $^1\text{H}$ - $^1\text{H}$  COSY spectra of  $\text{Re}[\text{TpCF}_3\text{PC-3-(CN)COOH}](\text{O})$  in  $\text{CDCl}_3$  at  $20^\circ\text{C}$ .

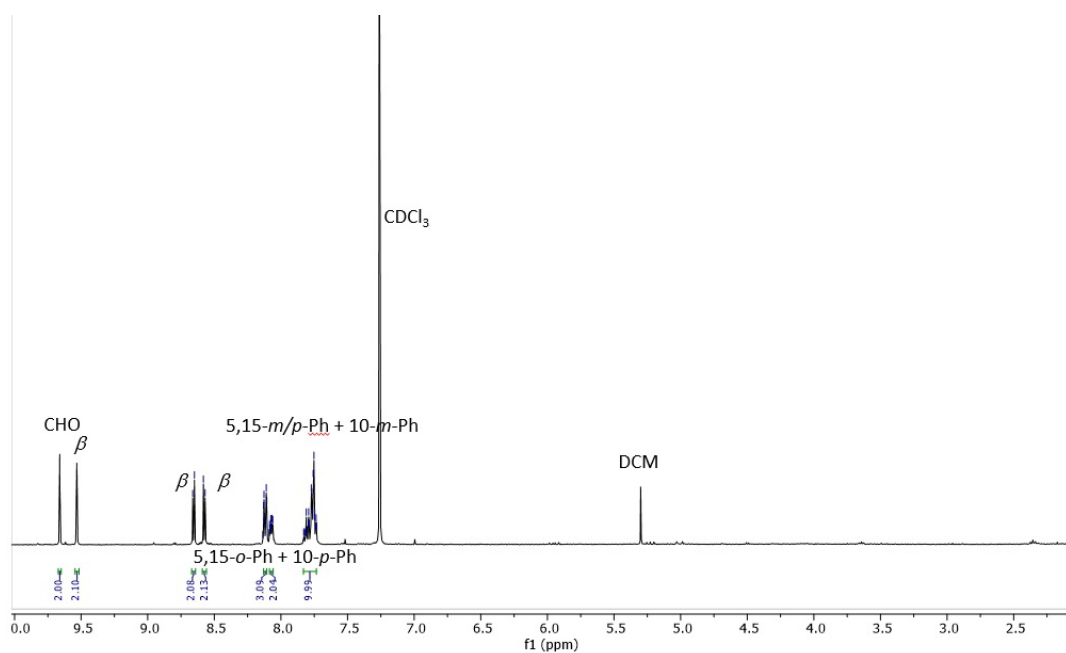

**Figure S39.**  $^1\text{H}$  NMR spectrum of  $\text{Au}[\text{TPC-3,17-(CHO)}_2]$  in  $\text{CDCl}_3$  at  $-20^\circ\text{C}$ .

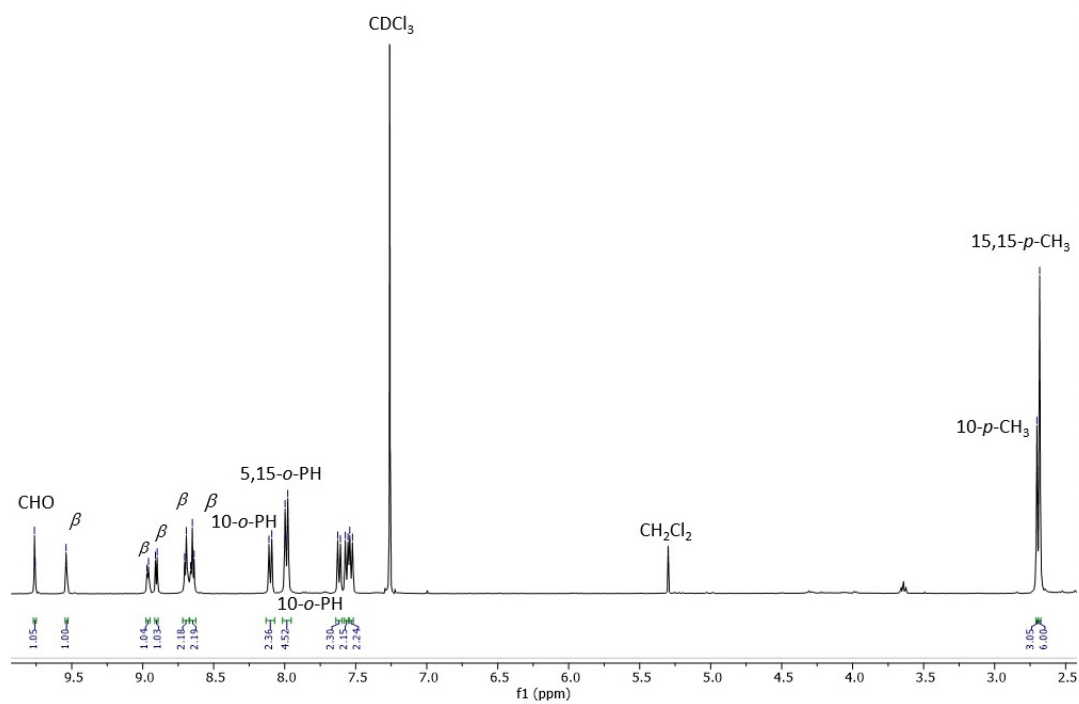

**Figure S40.**  $^1\text{H}$  NMR spectrum of  $\text{Au}[\text{TpCH}_3\text{PC-3-CHO}]$  in  $\text{CDCl}_3$  at  $-20^\circ\text{C}$ .

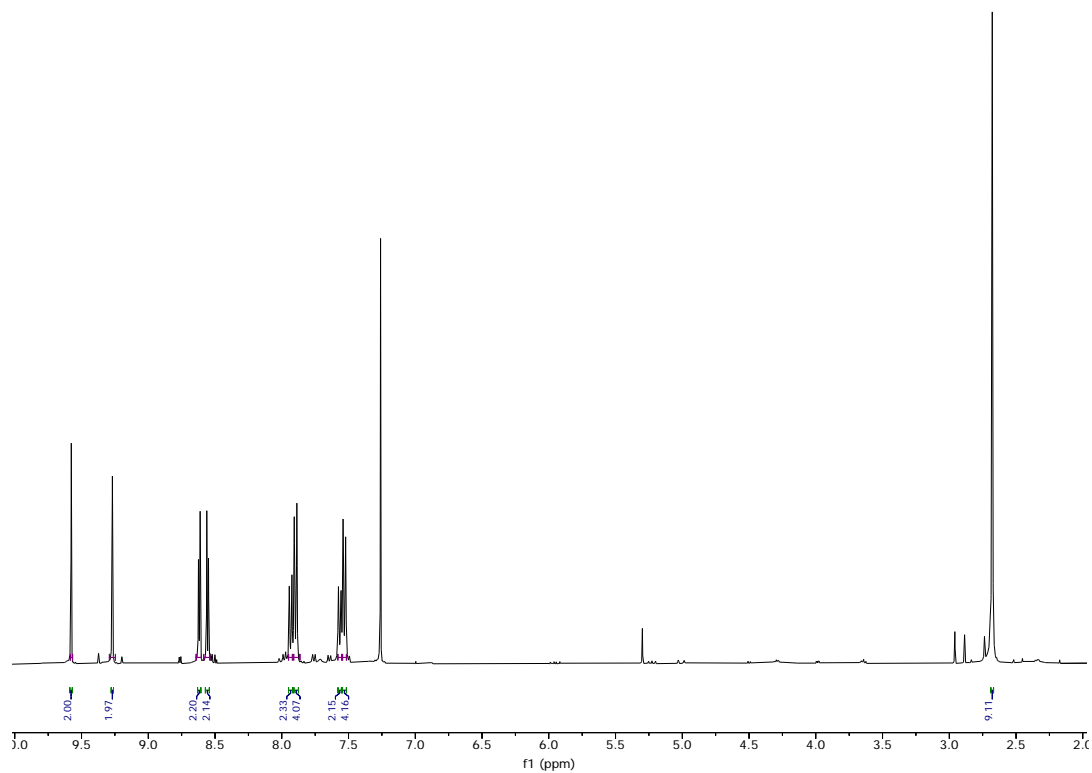

**Figure S41.** <sup>1</sup>H NMR spectrum of Au[TpCH<sub>3</sub>PC-3,17-(CHO)<sub>2</sub>] in CDCl<sub>3</sub> at -20°C.

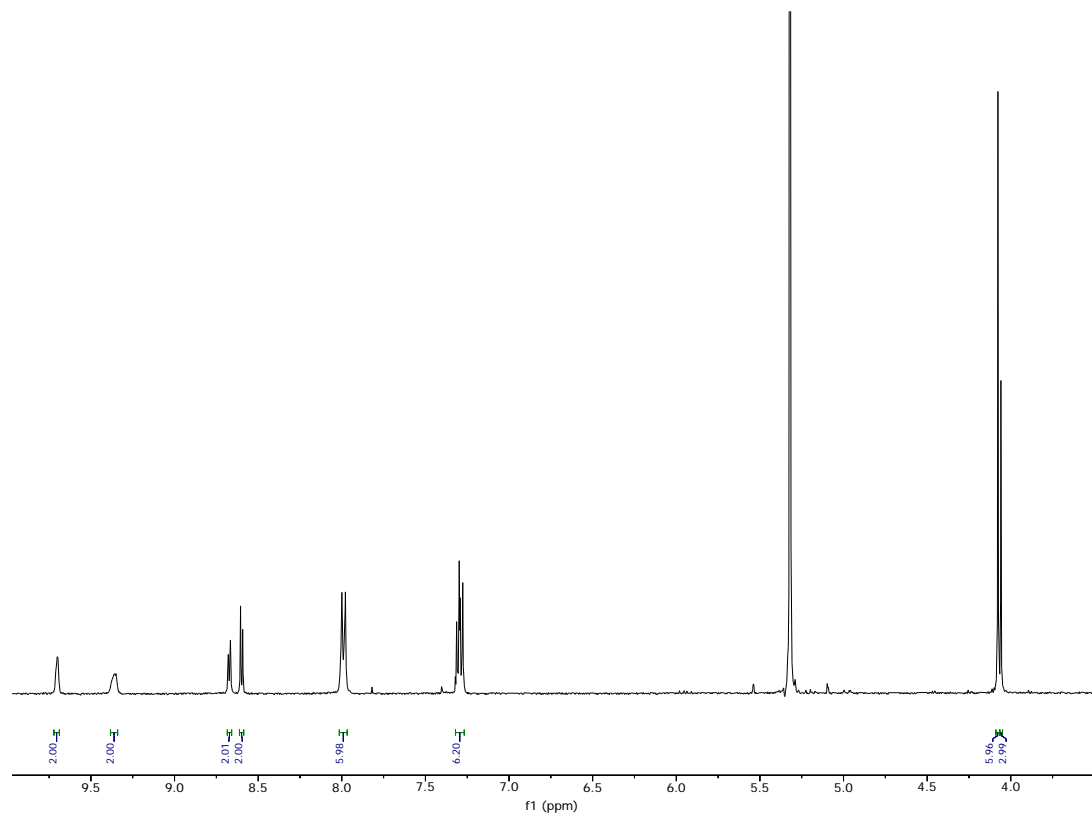

**Figure S42.** <sup>1</sup>H NMR spectrum of Au[TpOCH<sub>3</sub>PC-3,17-(CHO)<sub>2</sub>] in CDCl<sub>3</sub> at -20°C.



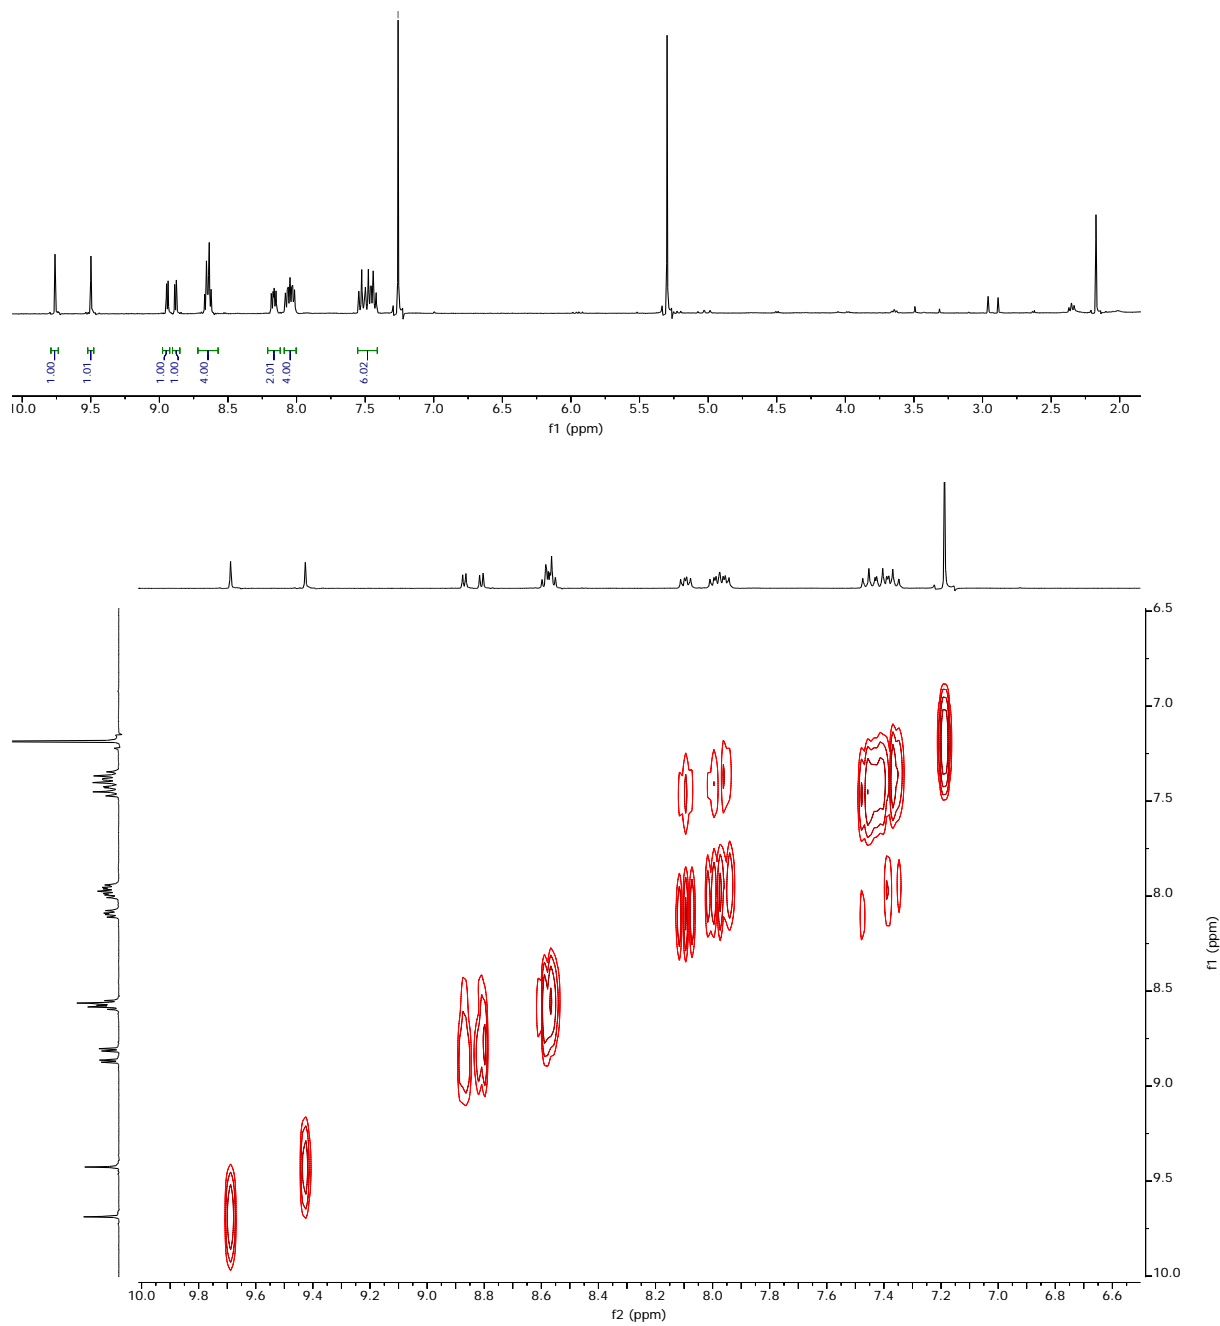

**Figure S193.** <sup>1</sup>H NMR and <sup>1</sup>H—<sup>1</sup>H COSY spectra of Au[TrFPC-3-CHO] in CDCl<sub>3</sub> at 20°C.

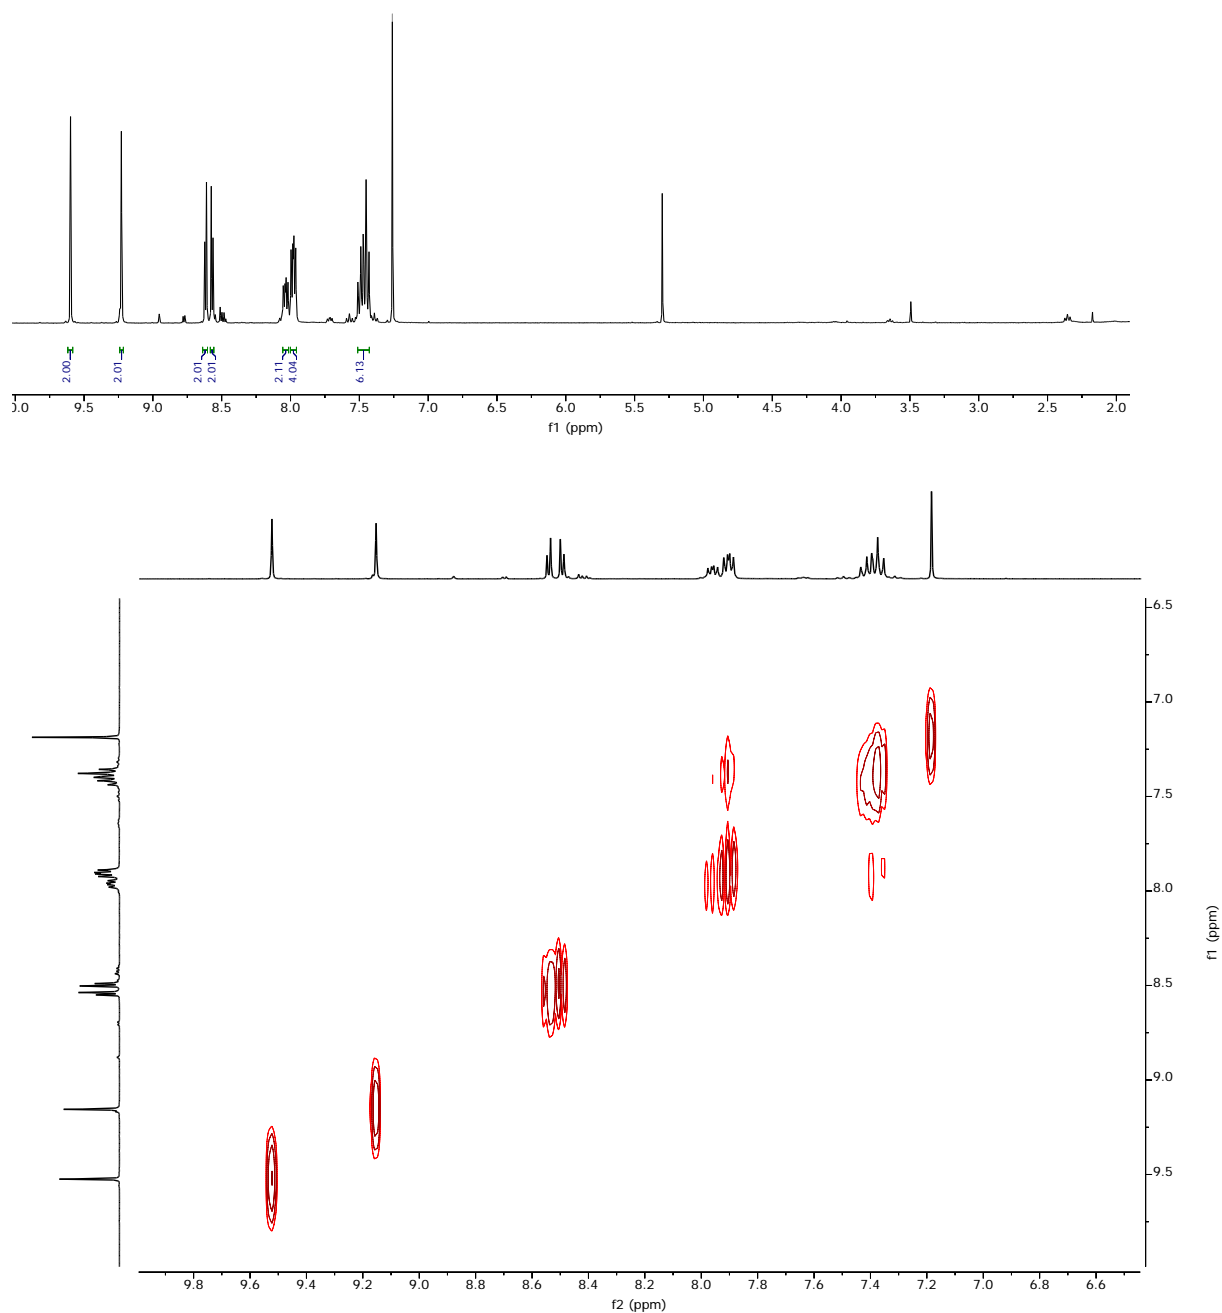

**Figure S44.** <sup>1</sup>H NMR and <sup>1</sup>H—<sup>1</sup>H COSY spectra of Au[TpFPC-3,17-(CHO)<sub>2</sub>] in CDCl<sub>3</sub> at 20°C.

#### D. Partial characterization of minor products

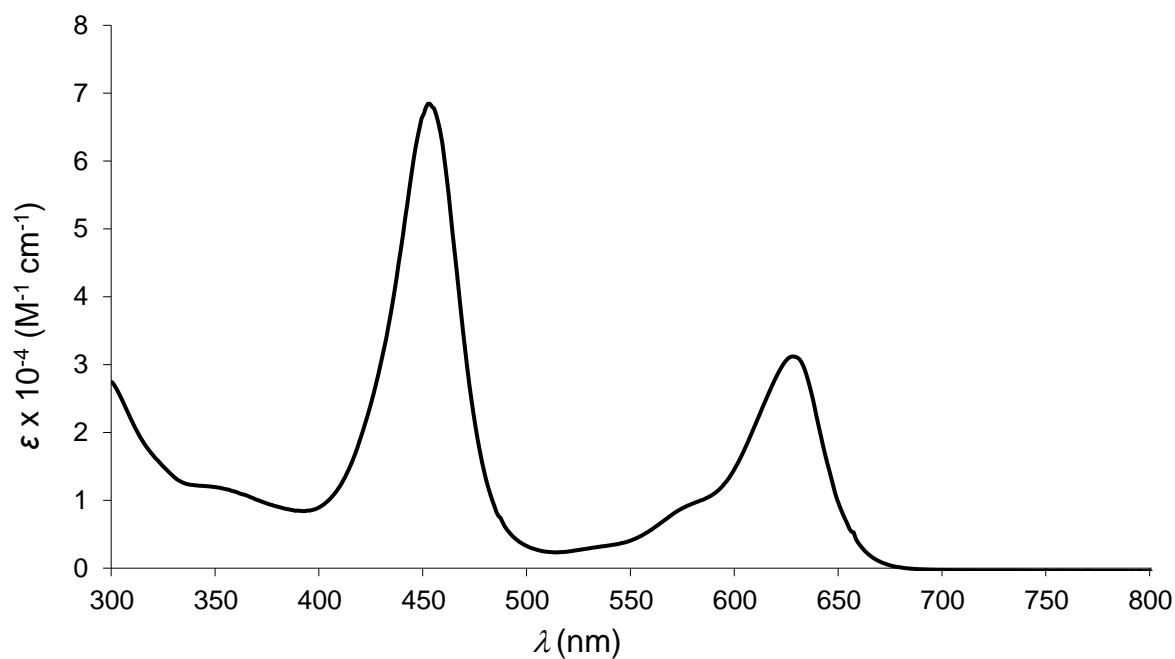

**Figure S45.** UV-vis spectrum of  $\text{Re}[\text{TpCH}_3\text{PC-3,17-(CHO)}_2]$  in dichloromethane.

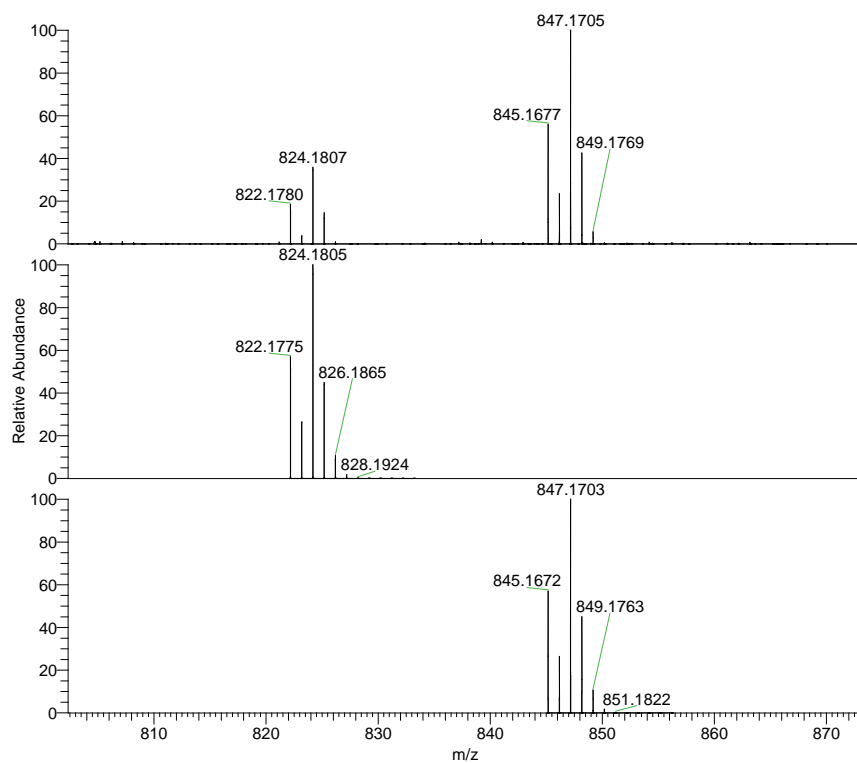

**Figure S46.** ESI mass spectrum of  $\text{Re}[\text{TpCH}_3\text{PC-3,17-(CHO)}_2](\text{O})$ .

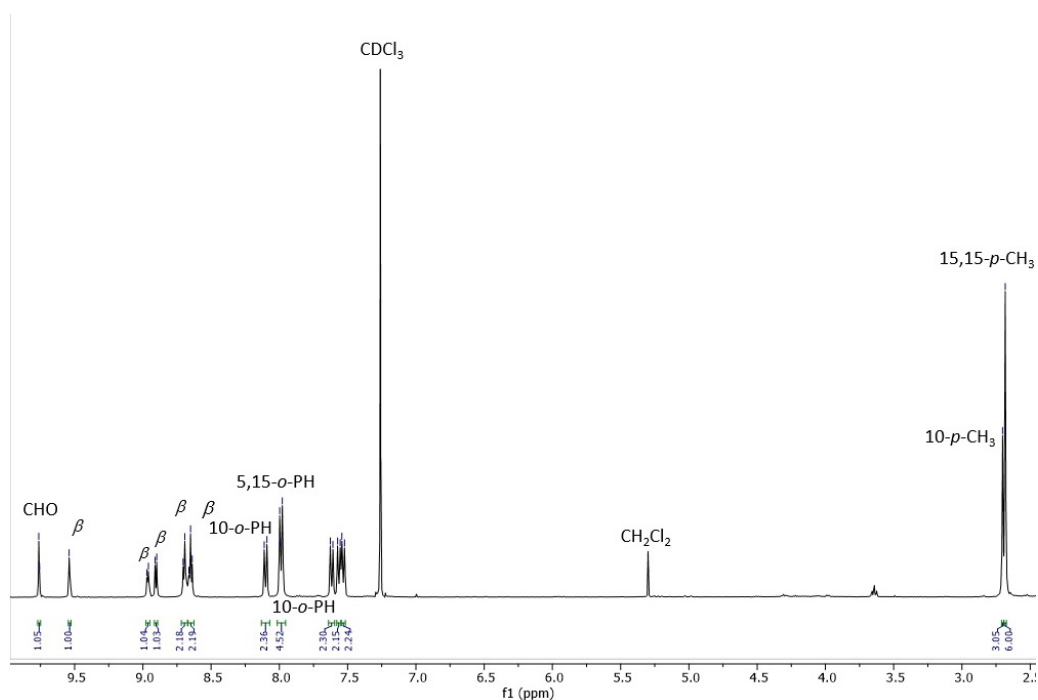

**Figure S47.**  $^1\text{H}$  NMR spectrum of  $\text{Au}[\text{TpCH}_3\text{PC-3-CHO}]$  in  $\text{CDCl}_3$  at  $-20^\circ\text{C}$ .

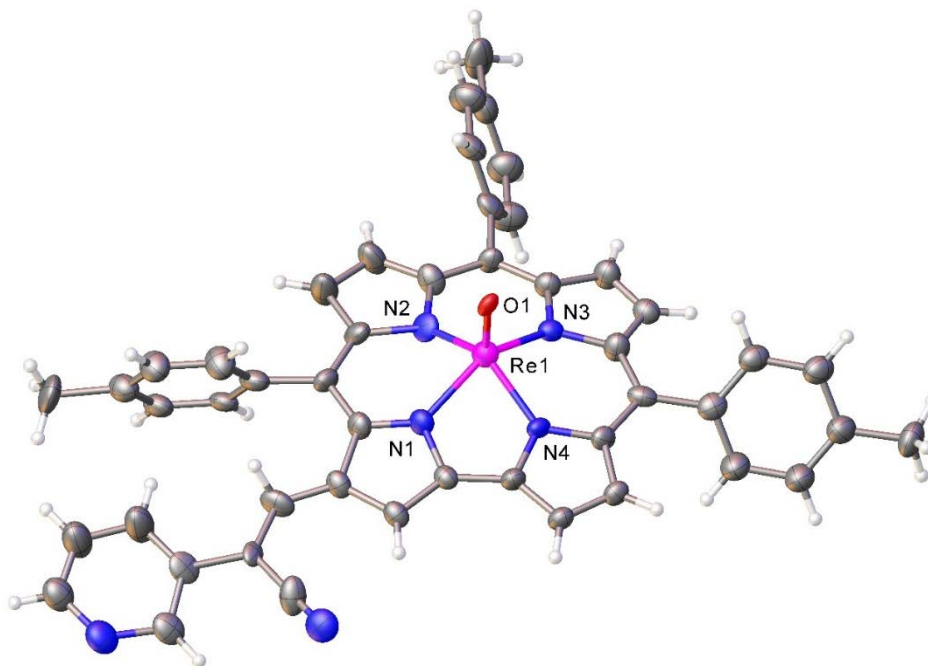

**Figure S48.** Thermal ellipsoid plot for the Knoevenagel condensate of  $\text{Re}[\text{TpCH}_3\text{PC-3-CHO}]$  with pyridin-3-ylacetonitrile. Selected distances ( $\text{\AA}$ ):  $\text{Re1-N1}$  2.003(18),  $\text{Re1-N2}$  1.87(2),  $\text{Re1-N3}$  1.973(18),  $\text{Re1-N4}$  1.956(16).  $\text{Re(1)-N(3)}$  1.973(18)  $\text{Re(1)-N(4)}$  1.956(16). The relatively poor quality of the structure implies that it should be only as proof of connectivity.
